# Supplementary material for: Phenothiazine-linked nucleosides and nucleotides for redox labelling of DNA
Source: Royal Society of Chemistry journal article supplement (doi:10.1039/c7ob01439b), 2017-01-01
Supplement: c7ob01439b1.pdf [file c7ob01439b1.pdf]

## Electronic Supporting Information for

### Phenothiazine-linked Nucleosides and Nucleotides for Redox Labelling of DNA

Anna Simonova,<sup>a</sup> Luděk Havran,<sup>b</sup> Radek Pohl,<sup>a</sup> Miroslav Fojta,<sup>\*b,c</sup> Michal Hocek<sup>\*a,d</sup>

<sup>a</sup> *Institute of Organic Chemistry and Biochemistry, Czech Academy of Sciences, Flemingovo namesti 2, CZ-16610 Prague 6, Czech Republic*

<sup>b</sup> *Institute of Biophysics, Czech Academy of Sciences, Kralovopolska 135, 612 65 Brno, Czech Republic*

<sup>c</sup> *Central European Institute of Technology, Masaryk University, Kamenice 753/5, CZ-625 00 Brno, Czech Republic*

<sup>d</sup> *Department of Organic Chemistry, Faculty of Science, Charles University in Prague, Hlavova 8, Prague-2 12843, Czech Republic*

#### Contents:

1. Kinetics of incorporation of dNTPs
2. NEAR
3. PCR
4. TdT (full gels)
5. Fluorescence
6. MALDI-TOF spectra (ssDNA)
7. Copies of NMR spectra
8. Additional electrochemistry data
9. References

## 1. Kinetics of incorporation of modified dNTPs

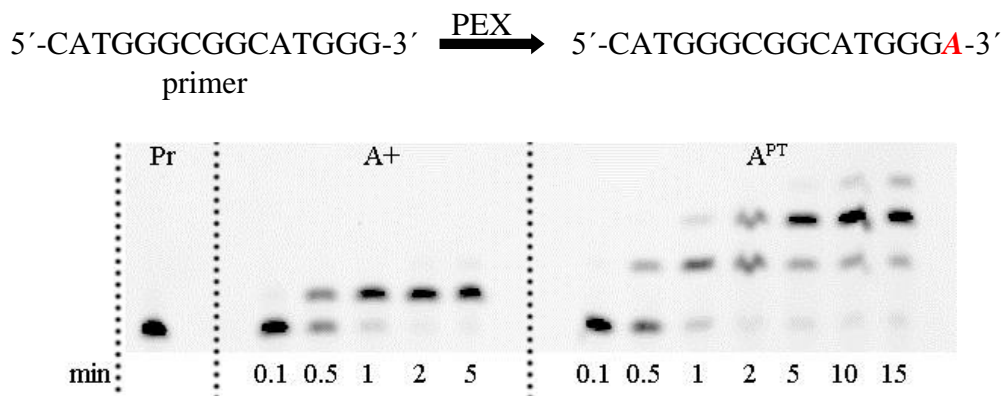

**Figure S1** PAGE analyses of kinetic single nucleotide extension experiments with  $\text{temp}^{\text{tempA}}$  using KOD XL DNA polymerases  $\text{dA}^{\text{PT}}\text{TP}$  ( $\text{dA}^{\text{PT}}$ ) in comparison with natural dATP (+). Time intervals are given in minutes.

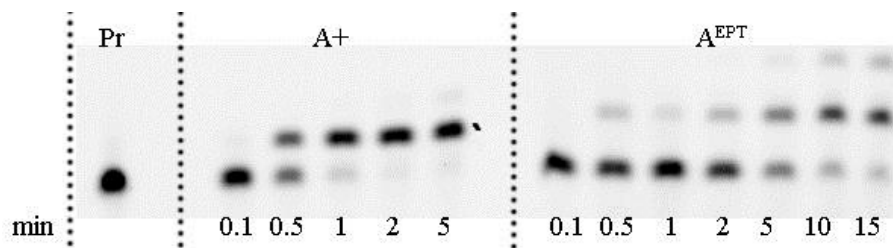

**Figure S2** PAGE analyses of kinetic single nucleotide extension experiments with  $\text{temp}^{\text{tempA}}$  using KOD XL DNA polymerases  $\text{dA}^{\text{EPT}}\text{TP}$  ( $\text{dA}^{\text{EPT}}$ ) in comparison with natural dATP (+). Time intervals are given in minutes.

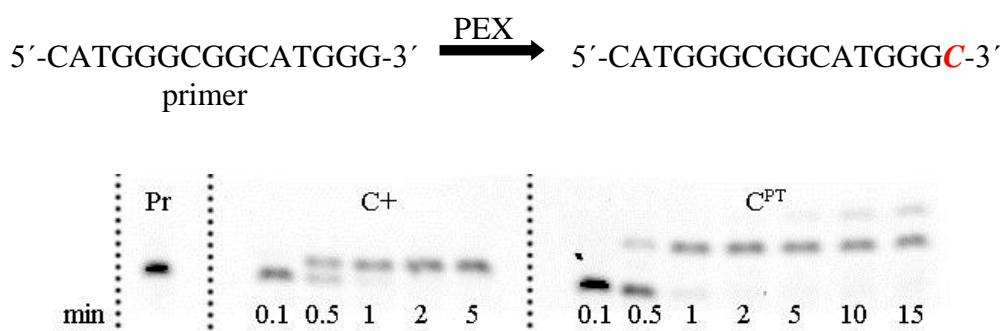

**Figure S3** PAGE analyses of kinetic single nucleotide extension experiments with  $\text{temp}^{\text{tempC}}$  using KOD XL DNA polymerases  $\text{dC}^{\text{PT}}\text{TP}$  ( $\text{dC}^{\text{PT}}$ ) in comparison with natural dCTP (+). Time intervals are given in minutes.

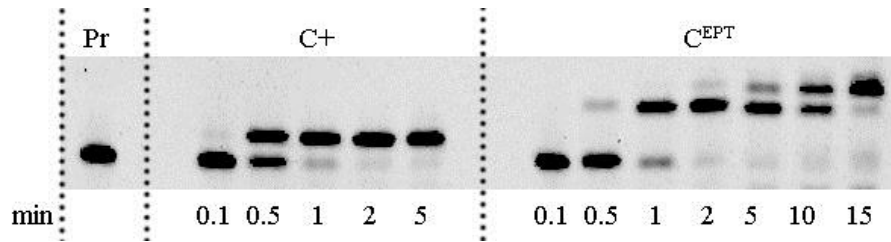

**Figure S4** PAGE analyses of kinetic single nucleotide extension experiments with  $\text{temp}^{\text{tempC}}$  using KOD XL DNA polymerases  $\mathbf{dC^{\text{EPT}}TP}$  ( $\mathbf{dC^{\text{EPT}}}$ ) in comparison with natural dATP (+). Time intervals are given in minutes.

## 2. NEAR

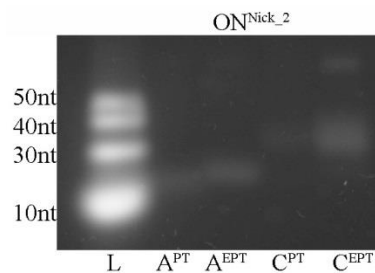

**Figure S5** Incorporation of modified dNTPs in NEAR. L: DNA ladder;  $\mathbf{A^{\text{PT}}}$ : product of NEAR with  $\mathbf{dA^{\text{PT}}TP}$ , dCTP, dGTP, dTTP;  $\mathbf{A^{\text{EPT}}}$ : product of NEAR with  $\mathbf{dA^{\text{EPT}}TP}$ , dCTP, dGTP, dTTP;  $\mathbf{C^{\text{PT}}}$ : product of NEAR with  $\mathbf{dC^{\text{PT}}TP}$ , dATP, dGTP, dTTP;  $\mathbf{C^{\text{EPT}}}$ : product of NEAR with  $\mathbf{dC^{\text{EPT}}TP}$ , dATP, dGTP, dTTP

## 3. PCR

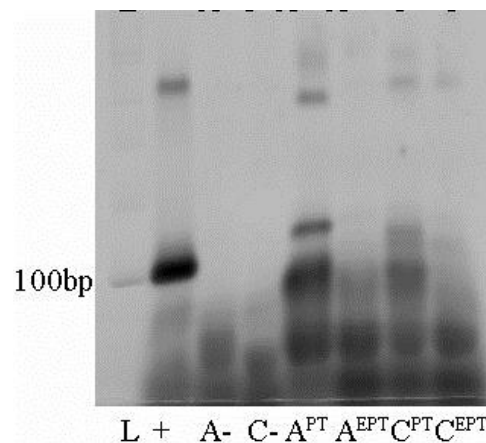

**Figure S6** PCR synthesis of 98-mer by KOD XL polymerase L: DNA ladder; +: product of PCR with natural dNTPs; A-: product of PCR with dCTP, dGTP, dTTP; C-: product of PCR with dATP, dGTP, dTTP;  $\mathbf{A^{\text{PT}}}$ : product of PCR with  $\mathbf{dA^{\text{PT}}TP}$ , dCTP, dGTP, dTTP;  $\mathbf{A^{\text{EPT}}}$ : product of PCR with  $\mathbf{dA^{\text{EPT}}TP}$ , dCTP, dGTP, dTTP;  $\mathbf{C^{\text{PT}}}$ : product of PCR with  $\mathbf{dC^{\text{PT}}TP}$ , dATP, dGTP, dTTP;  $\mathbf{C^{\text{EPT}}}$ : product of PCR with  $\mathbf{dC^{\text{EPT}}TP}$ , dATP, dGTP, dTTP.

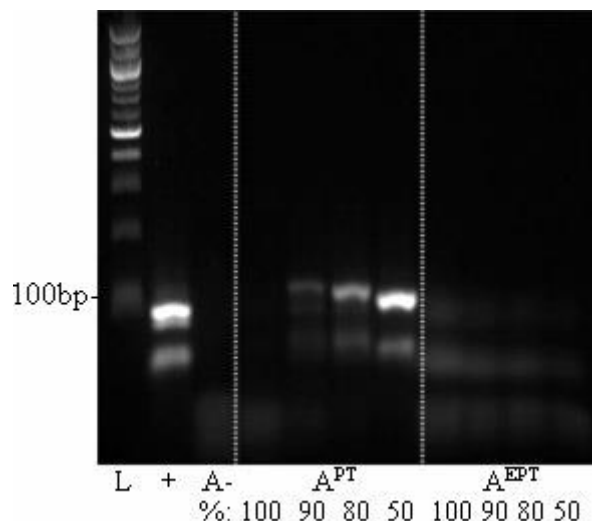

**Figure S7** PCR synthesis of 98-mer by KOD XL polymerase. L: DNA ladder; +: product of PCR with natural dNTPs; A-: product of PCR with dCTP, dGTP, dTTP; C-: product of PCR with dATP, dGTP, dTTP; A<sup>PT</sup>: product of PCR with **dA<sup>PT</sup>TP**, dCTP, dGTP, dTTP; A<sup>EPT</sup>: product of PCR with **dA<sup>EPT</sup>TP**, dCTP, dGTP, dTTP. The percentage corresponds to the proportion of modified triphosphates (**dA<sup>PT</sup>TP** or **dA<sup>EPT</sup>TP**) in combination with natural dATP in the PCR reaction mixture.

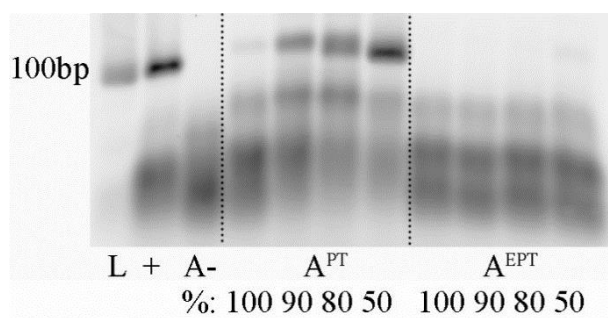

**Figure S8** PCR synthesis of 98-mer by KOD XL polymerase with FAM-labeled primers. L: DNA ladder; +: product of PCR with natural dNTPs; A-: product of PCR with dCTP, dGTP, dTTP; C-: product of PCR with dATP, dGTP, dTTP; A<sup>PT</sup>: product of PCR with **dA<sup>PT</sup>TP**, dCTP, dGTP, dTTP; A<sup>EPT</sup>: product of PCR with **dA<sup>EPT</sup>TP**, dCTP, dGTP, dTTP. The percentage corresponds to the proportion of modified triphosphates (**dA<sup>PT</sup>TP** or **dA<sup>EPT</sup>TP**) in combination with natural dATP in the PCR reaction mixture.

#### 4. TdT (Full gels)

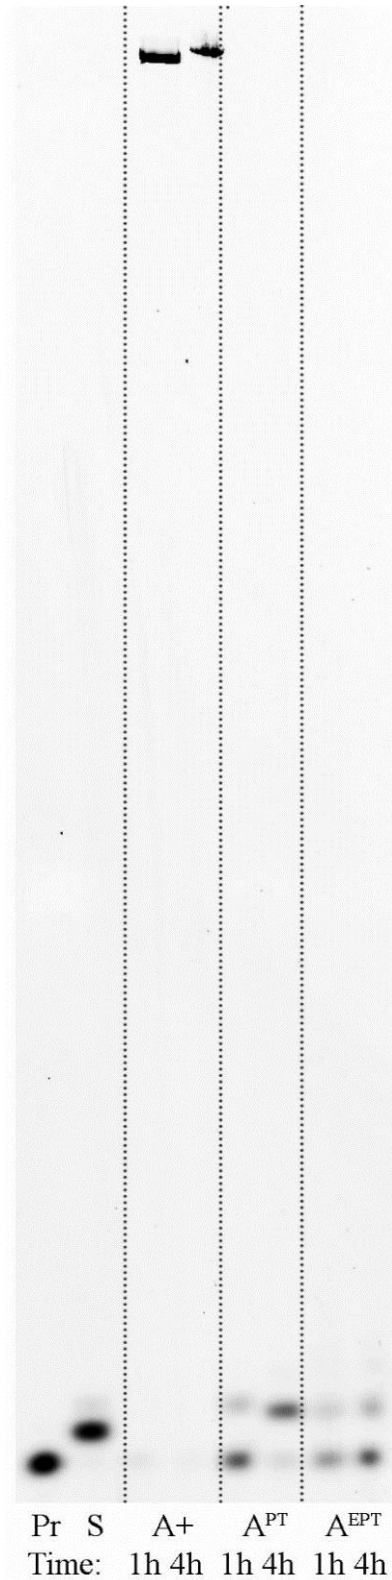

**Figure S9** TdT-catalyzed DNA chain elongation. Pr: primer; S-standard (PEX product of  $temp^{termA}$  with dATP); A+, A<sup>PT</sup> and A<sup>EPT</sup>: products of primer<sup>nd</sup> elongation using terminal transferase and either dATP, dA<sup>PT</sup>TP or dA<sup>EPT</sup>TP respectively. Time intervals are given in hours.

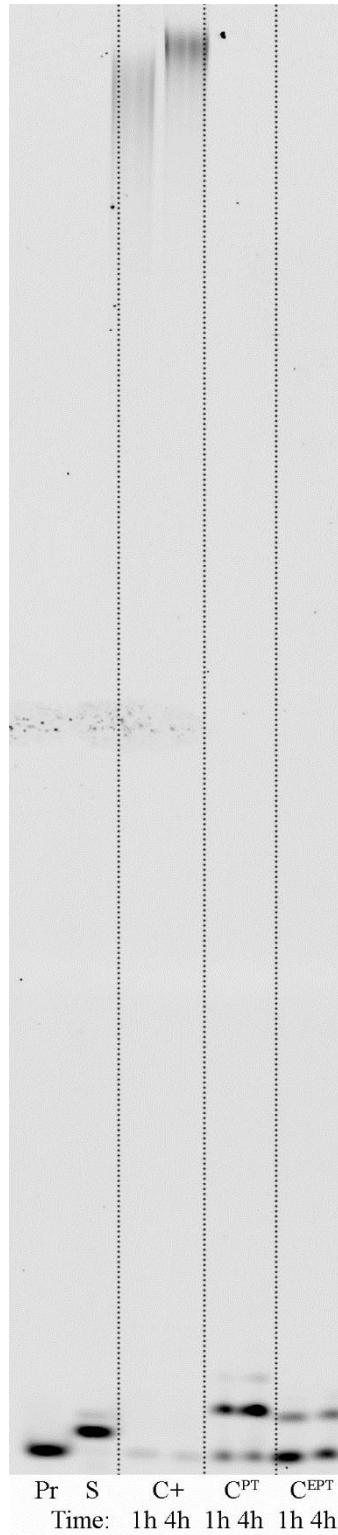

**Figure S10** TdT-catalyzed DNA chain elongation. Pr: primer; S-standard (PEX product of  $\text{temp}^{\text{term}C}$  with dCTP); C+, C<sup>PT</sup> and C<sup>EPT</sup>: products of primer<sup>md</sup> elongation using terminal transferase and either dCTP, **dC<sup>PT</sup>TP** or **dC<sup>EPT</sup>TP** respectively. Time intervals are given in hours.

## 5. Fluorescence

### Determination of extinction coefficients

Extinction coefficients were measured using 1 ml quartz cuvettes on a Cary 100 UV-VIS spectrometer (Agilent Technologies). The absorption coefficients were calculated according to the following Beer-Lambert Law equation

$$A = C \cdot l \cdot \varepsilon$$

where  $\varepsilon$  is the extinction coefficient,  $C$  is the exact concentration of the sample in the cuvette,  $l$  is the length of the path that the light travels through the cuvette and  $A$  is the absorbance of the sample. Measurements were triplicated.

### Determination of fluorescence quantum yields

Fluorescence spectra were measured on a Fluoromax 4 spectrofluorimeter equipped with a thermostated cuvette holder at 25 °C. (HORIBA Scientific). The excitation wavelength was 350 nm and the recorded spectral range was 370 – 680 nm. Relative determination of the fluorescence quantum yields was performed using quinine sulfate in 0.5 M H<sub>2</sub>SO<sub>4</sub> ( $\Phi_f = 0.546$  at 25 °C) as a standard.<sup>S1</sup> The absorbance of sample solutions at the excitation wavelength were kept below 0.08 to avoid inner filter effect. The quantum yields were calculated using following equation<sup>S2</sup>

$$\Phi_{f,x} = \Phi_{f,st} \frac{F_x}{F_{st}} \frac{1 - 10^{-Abs_{st}}}{1 - 10^{-Abs_x}} \frac{n_x^2}{n_{st}^2}$$

where  $\Phi_f$  is the quantum yield,  $F$  is the integrated fluorescence intensity,  $Abs$  is the absorbance of solution at the excitation wavelength,  $n$  is the refractive index of the solvent. The subscripts  $x$  and  $st$  stand for the sample and standard, respectively. Measurements were triplicated.

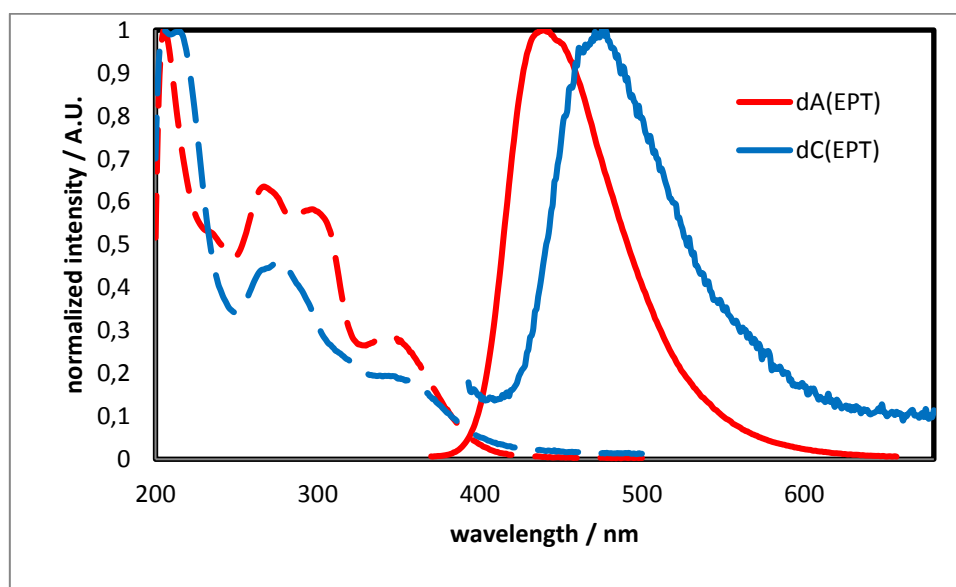

**Figure S11** Normalized absorption (dashed lines) and fluorescence (solid lines) of compounds **dA<sup>EPT</sup>** and **dC<sup>EPT</sup>** in EtOH

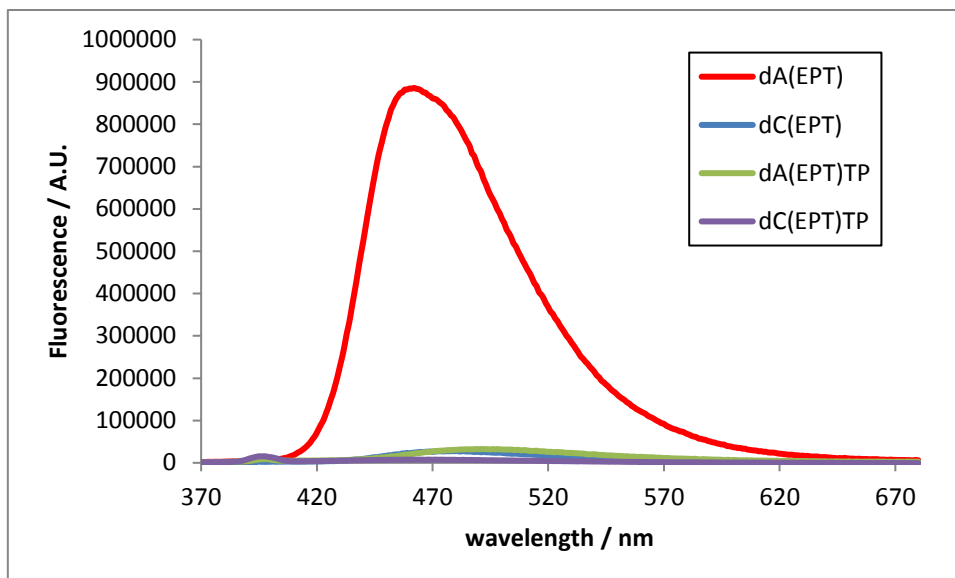

**Figure S12** Fluorescence spectra of modified  $\text{dA}^{\text{EPT}}$  and  $\text{dC}^{\text{EPT}}$  in EtOH;  $\text{dA}^{\text{EPT}}\text{TP}$  and  $\text{dC}^{\text{EPT}}\text{TP}$  in aqueous solutions

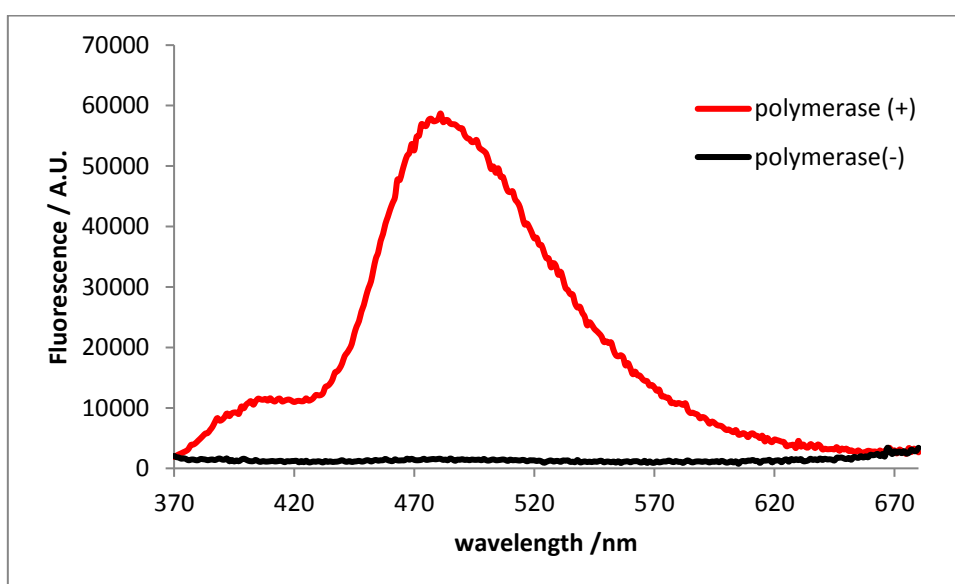

**Figure S13** fluorescence spectra ( $\lambda_{\text{ex}}=486 \text{ nm}$ ) of  $\text{ON}^{\text{rnd16}} \text{A}^{\text{EPT}}$  obtained after incubation of PEX reaction mixtures containing  $\text{dA}^{\text{EPT}}\text{TP}$ ,  $\text{dCTP}$ ,  $\text{dTTP}$ ,  $\text{dGTP}$ , primer<sup>rnd</sup> and biotinylated temp<sup>rnd16</sup> either with (red line) or without (black line) KOD XL DNA polymerase. The reaction mixture (100  $\mu\text{L}$ ) contained biotinylated template<sup>rnd16</sup> (100  $\mu\text{M}$ , 3.2  $\mu\text{L}$ ), primer<sup>rnd</sup> (100  $\mu\text{M}$ , 3.2  $\mu\text{L}$ ), dNTPs (4 mM, 5.2  $\mu\text{L}$ ), KOD XL polymerase (1.25 U KOD XL; in the case of negative control Milli-Q water was added instead) in enzyme reaction buffer (5  $\mu\text{L}$ ) supplied by the manufacturer. The reaction mixture was incubated for 1h at 60  $^{\circ}\text{C}$  in a thermal cycler. The reaction was stopped by cooling to 4 $^{\circ}\text{C}$ . DNA from solutions was isolated using Streptavidin Magnetic Particles (Roche, 100  $\mu\text{L}$ ). and purified by using QIAquick Nucleotide Removal Kit (QIAGEN). The difference between two samples indicates that  $\text{dA}^{\text{EPT}}\text{TP}$  is accepted as a substrate by DNA polymerase and does not bind unspecifically to DNA.



## 6. MALDI-TOF spectra

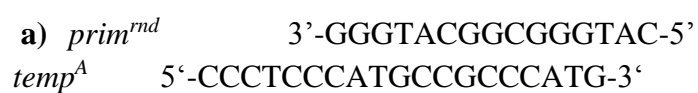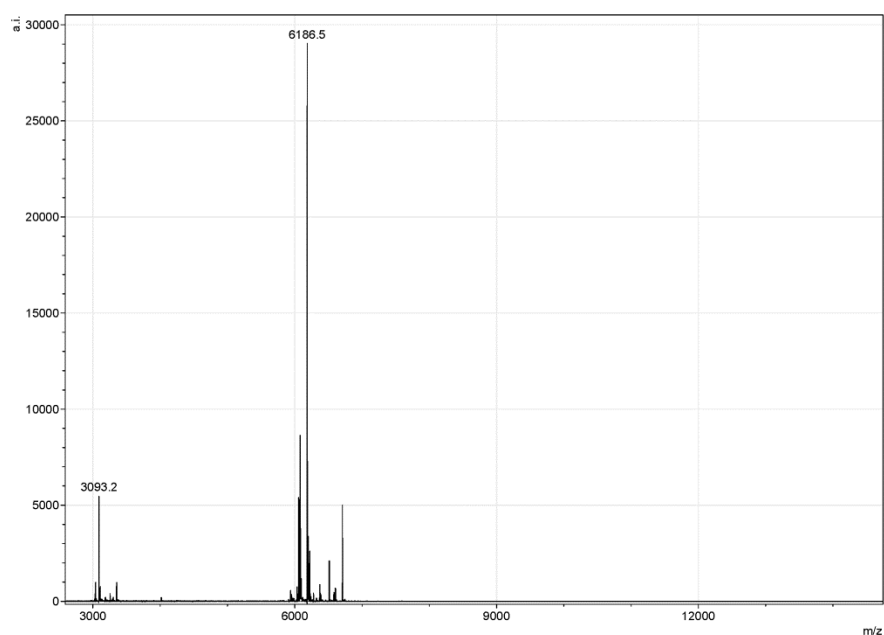

**Figure S14** MALDI-TOF spectrum of ON<sup>A</sup> A<sup>PT</sup>. Calculated: 6185.2 Da; found: 6186.5 Da;  $\Delta = 1.30$

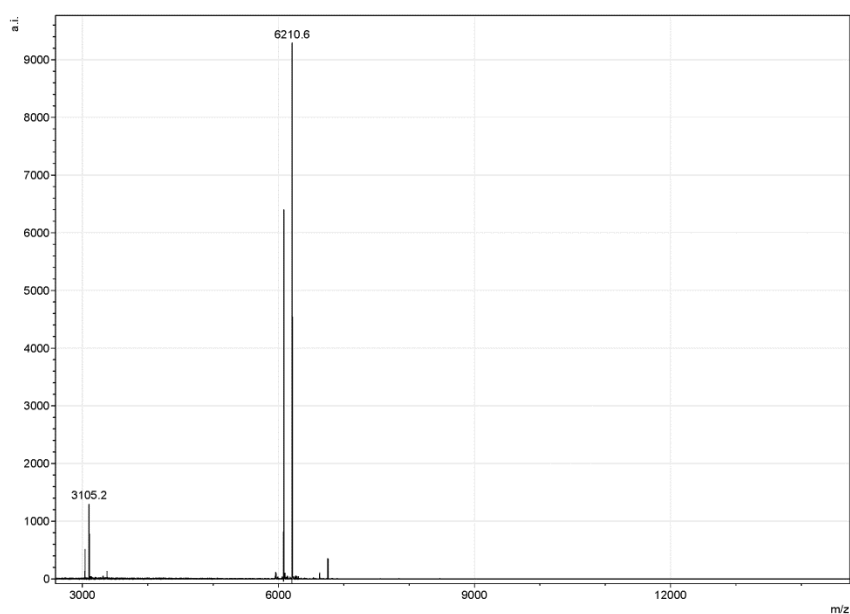

**Figure S15** MALDI-TOF spectrum of ON<sup>A</sup> A<sup>EPT</sup>. Calculated: 6209.2 Da; found: 6210.6 Da;  $\Delta = 1.40$

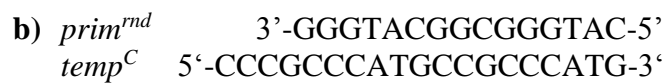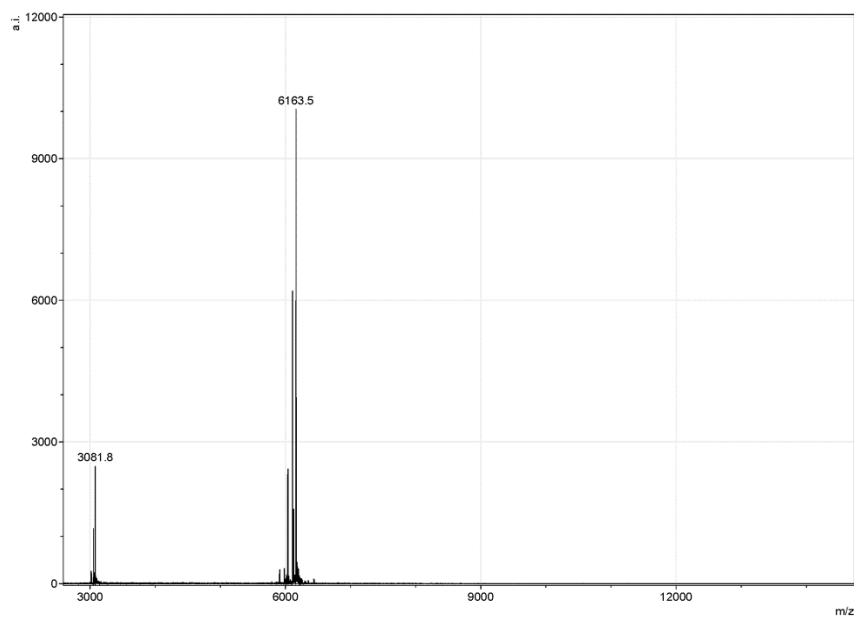

**Figure S16** MALDI-TOF spectrum of ON<sup>C</sup> C<sup>P</sup>T. Calculated: 6162.2 Da; found: 6163.5 Da;  $\Delta = 1.30$

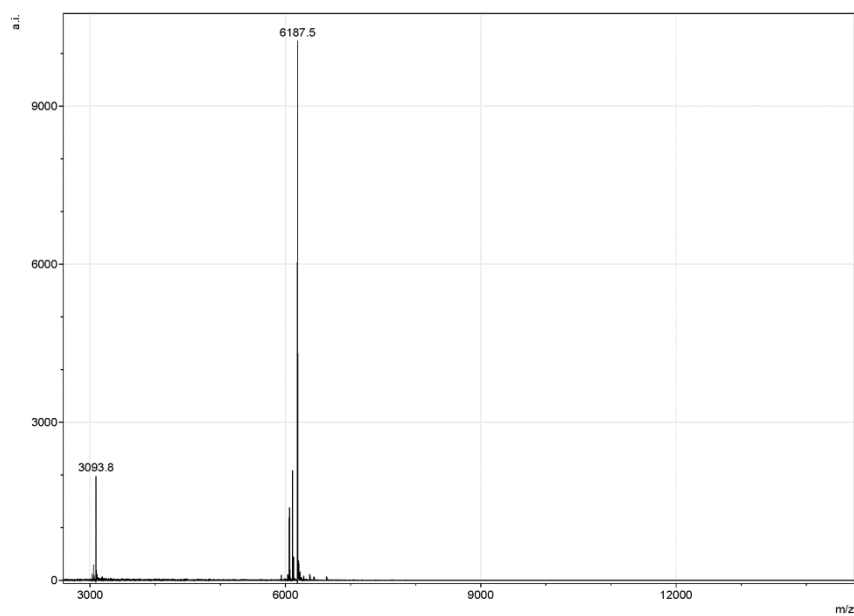

**Figure S17** MALDI-TOF spectrum of ON<sup>C</sup> C<sup>E</sup>P<sup>T</sup>. Calculated: 6186.2 Da; found: 6187.5 Da;  $\Delta = 1.30$

c) *prim*<sup>md</sup> 3'-GGGTACGGCGGGTAC-5'  
*temp*<sup>md</sup> 5'-CTAGCATGAGCTCAGTCCCATGCCGCCCATG-3'

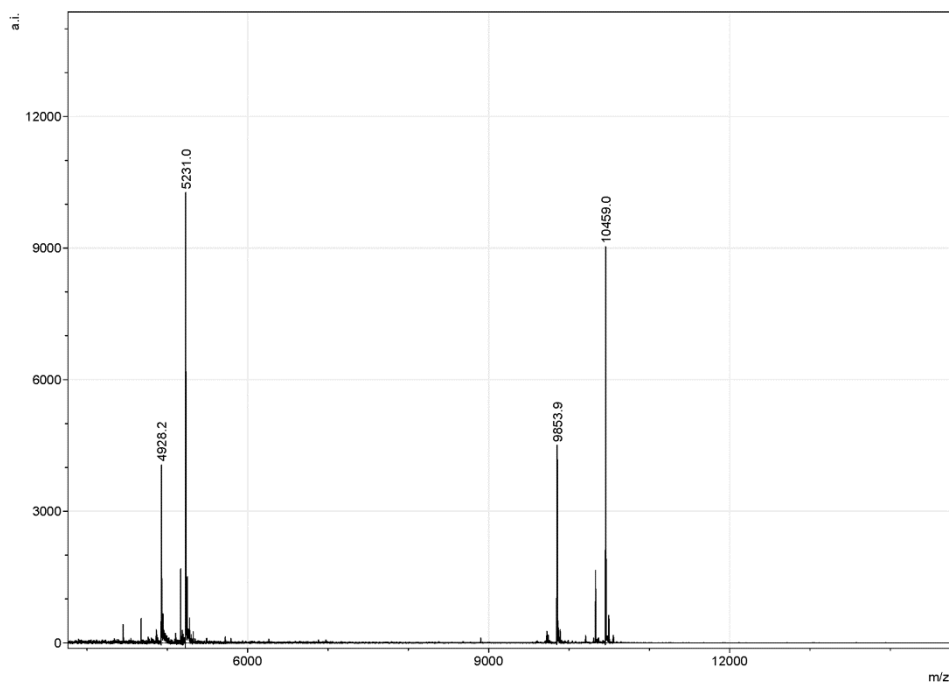

**Figure S18** MALDI-TOF spectrum of ON<sup>md16</sup> A<sup>PT</sup>. Calculated: 10458.46 Da; found: 10459.00 Da;  $\Delta = 0.54$

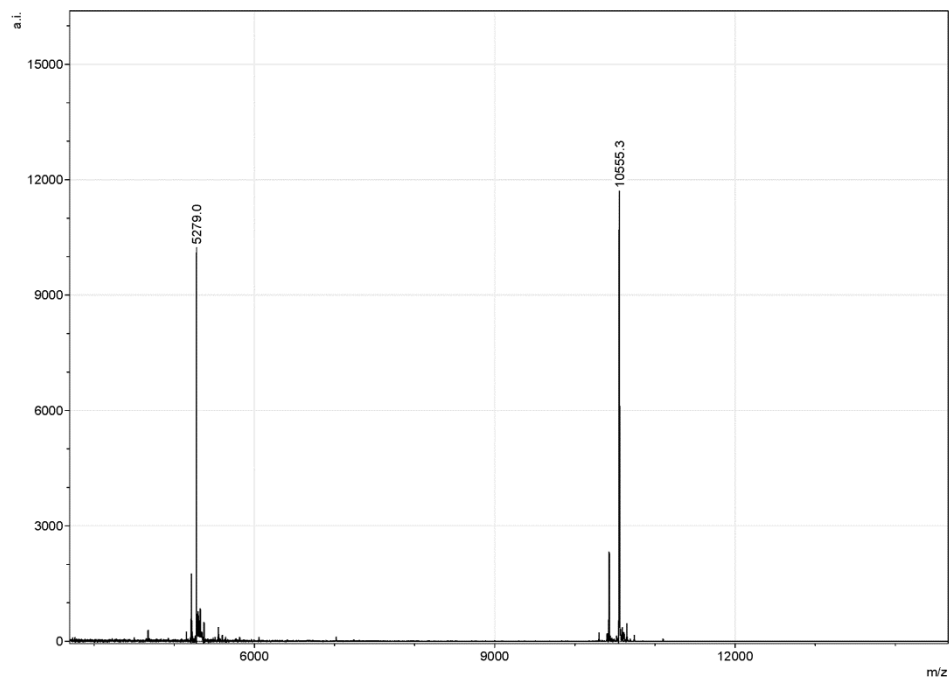

**Figure S19** MALDI-TOF spectrum of ON<sup>md16</sup> A<sup>EPT</sup>. Calculated: 10554.54 Da; found: 10555.3 Da;  $\Delta = 0.76$

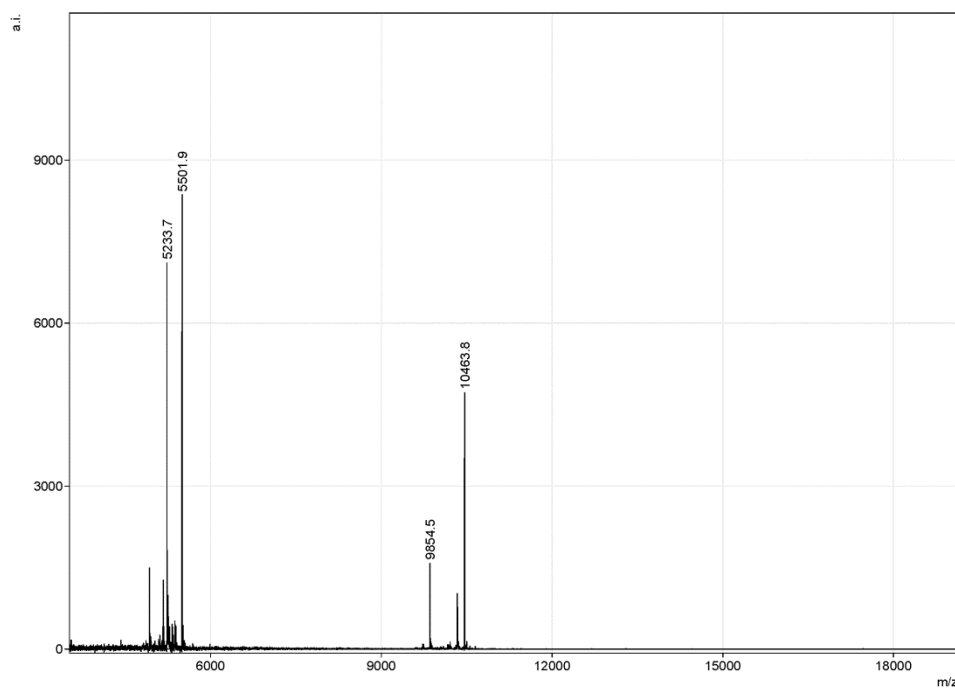

**Figure S20** MALDI-TOF spectrum of  $\text{ON}^{\text{md16}} \text{C}^{\text{PT}}$ . Calculated: 10462.46 Da; found: 10463.8 Da;  $\Delta = 1.34$

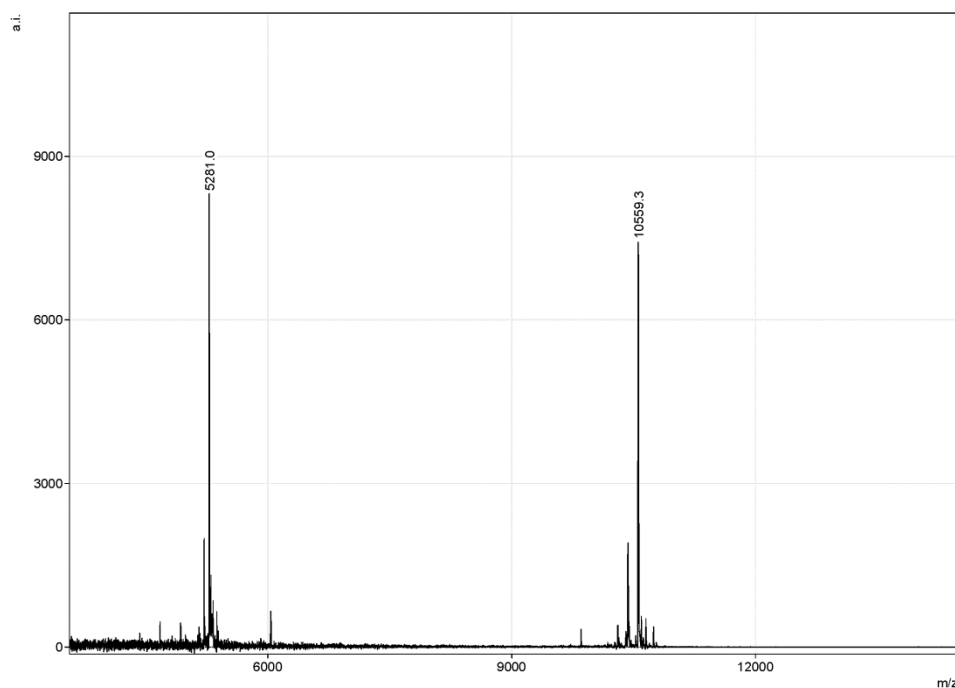

**Figure S21** MALDI-TOF spectrum of  $\text{ON}^{\text{md16}} \text{C}^{\text{EPT}}$ . Calculated: 10558.54 Da; found: 10559.3 Da;  $\Delta = 0.76$

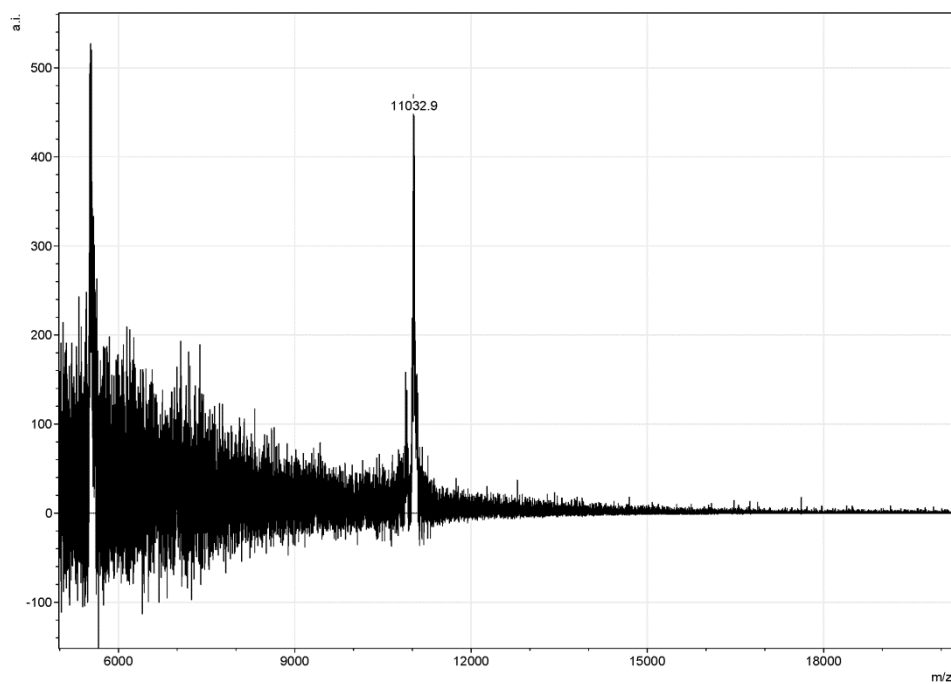

**Figure S22** MALDI-TOF spectrum of  $\text{ON}^{\text{md16}} \text{A}^{\text{PT}} \text{C}^{\text{EBF}}$ . Calculated: 11031,10 Da; found: 11032.90 Da;  $\Delta = 1.8$

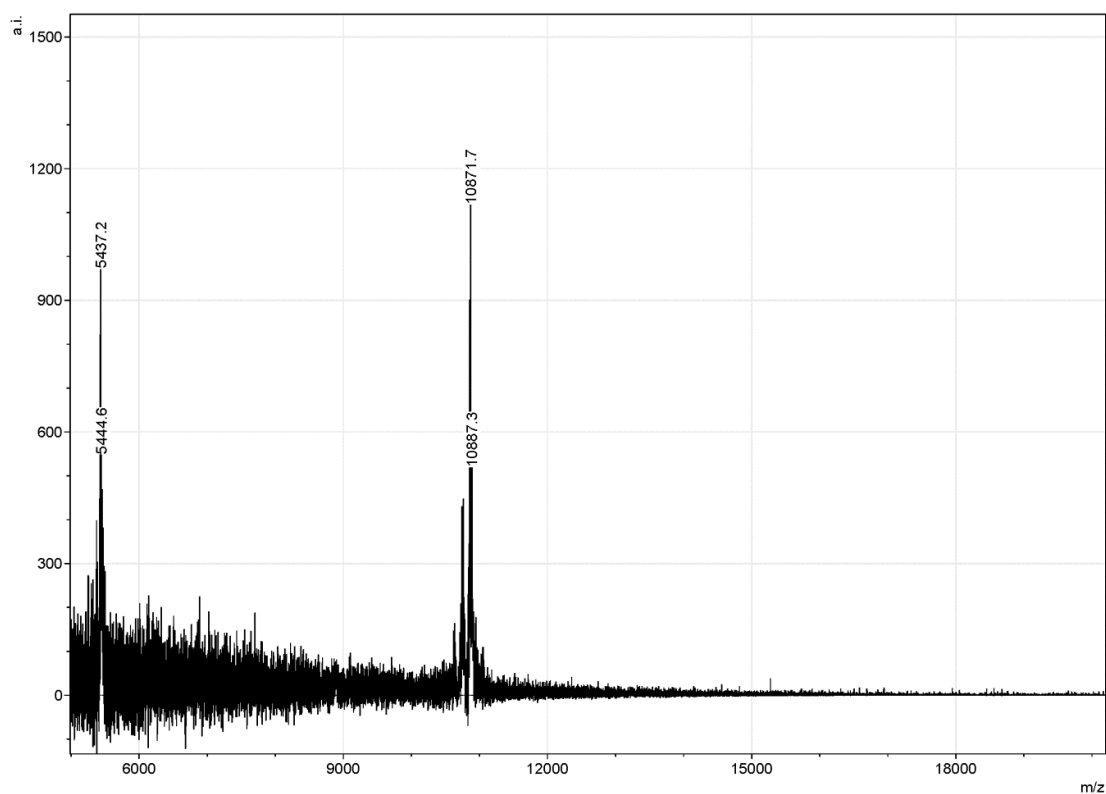

**Figure S23** MALDI-TOF spectrum of  $\text{ON}^{\text{md16}} \text{A}^{\text{PT}} \text{U}^{\text{NO}_2}$ . Calculated: 10886.94 Da; found: 10887.3 Da;  $\Delta = 0.36$

\* Found mass 10871,7 Da corresponds to the absence of one N-Me group from phenothiazine label in the sample  $[\text{M}-\text{CH}_3]^+$

Nick\_1A 5'-P-GTCGTGAGTG-3'

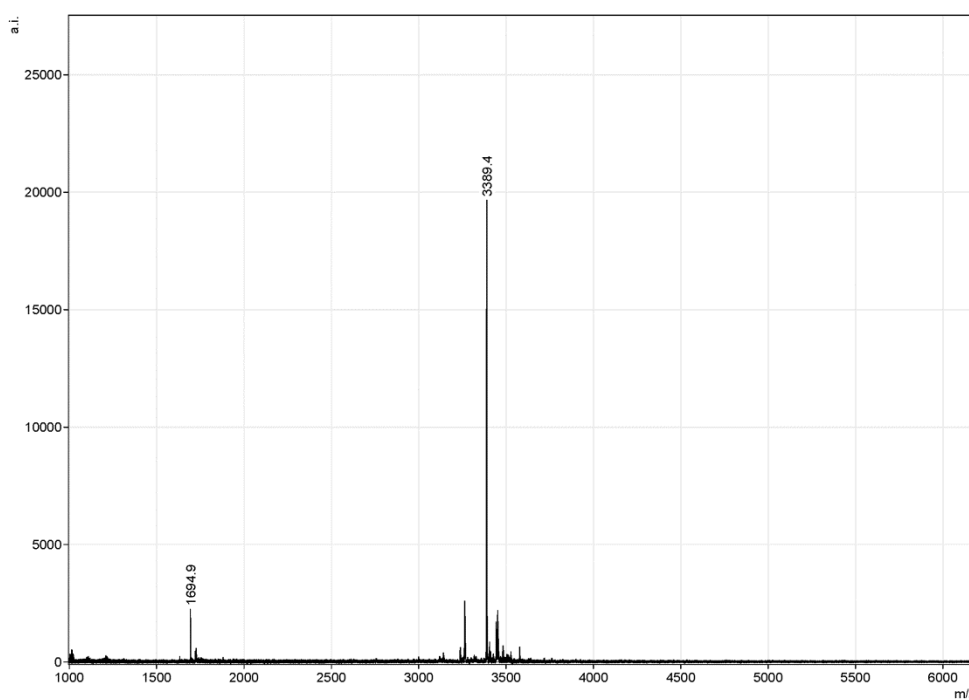

**Figure S24** MALDI-TOF spectrum of ON<sup>Nick\_1A</sup> A<sup>PT</sup>. Calculated: 3388.29 Da; found: 3389.4 Da;  $\Delta = 1.11$

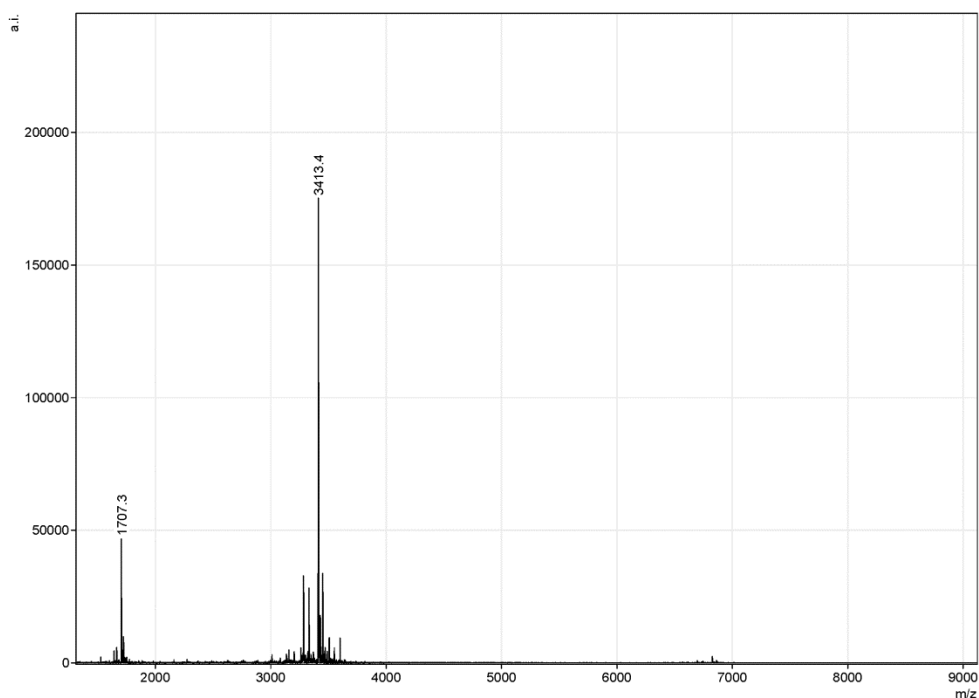

**Figure S25** MALDI-TOF spectrum of ON<sup>Nick\_1A</sup> A<sup>EPT</sup>. Calculated: 3412.31 Da; found: 3413.4 Da;  $\Delta = 1.09$

Nick\_10mer\_1C 5'-P-GTCCATGAGTG-3'

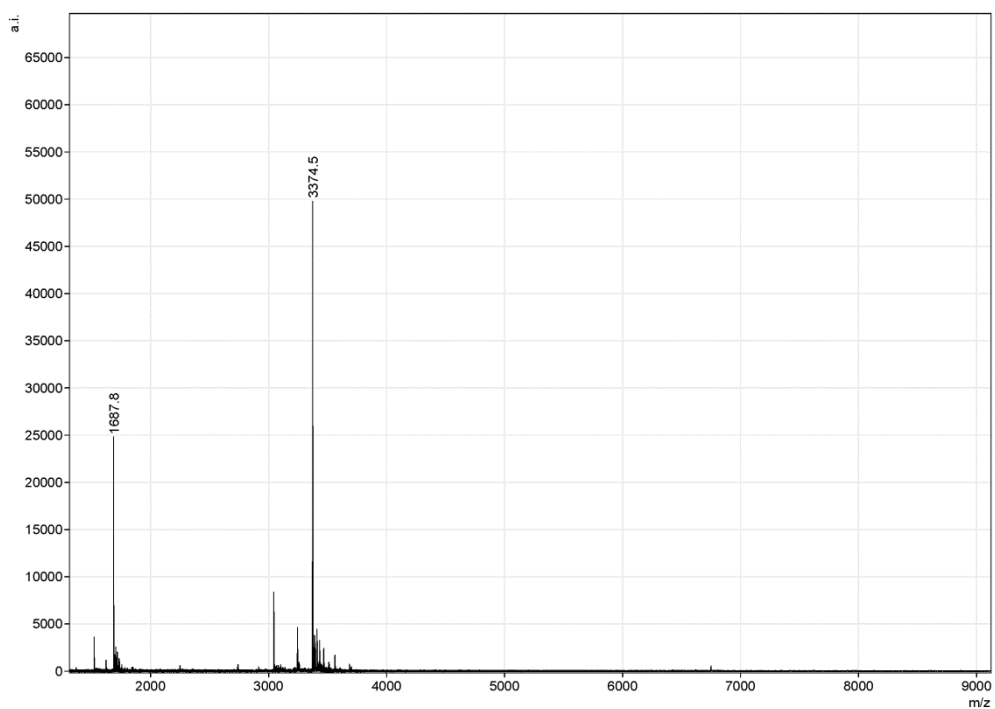

**Figure S26** MALDI-TOF spectrum of ON<sup>Nick\_1C</sup> C<sup>PT</sup>. Calculated: 3373.69 Da; found: 3374.5 Da;  $\Delta = 0.81$

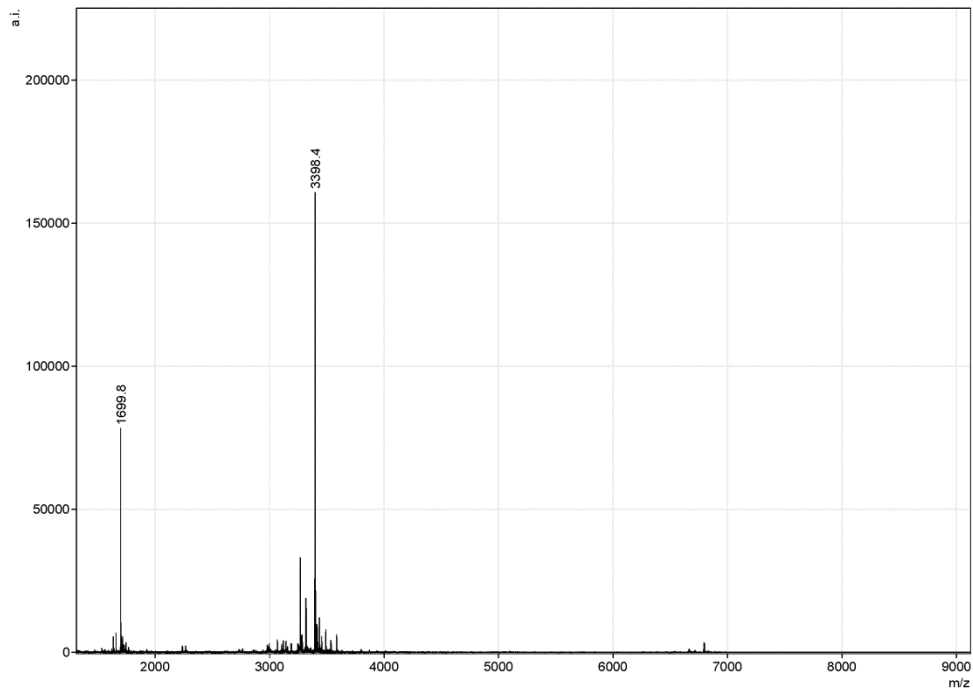

**Figure S27** MALDI-TOF spectrum of ON<sup>Nick\_1C</sup> C<sup>EPT</sup>. Calculated: 3397.41 Da; found: 3398.4 Da;  $\Delta = 0.99$

5'-P-TTCATGACTG-3'

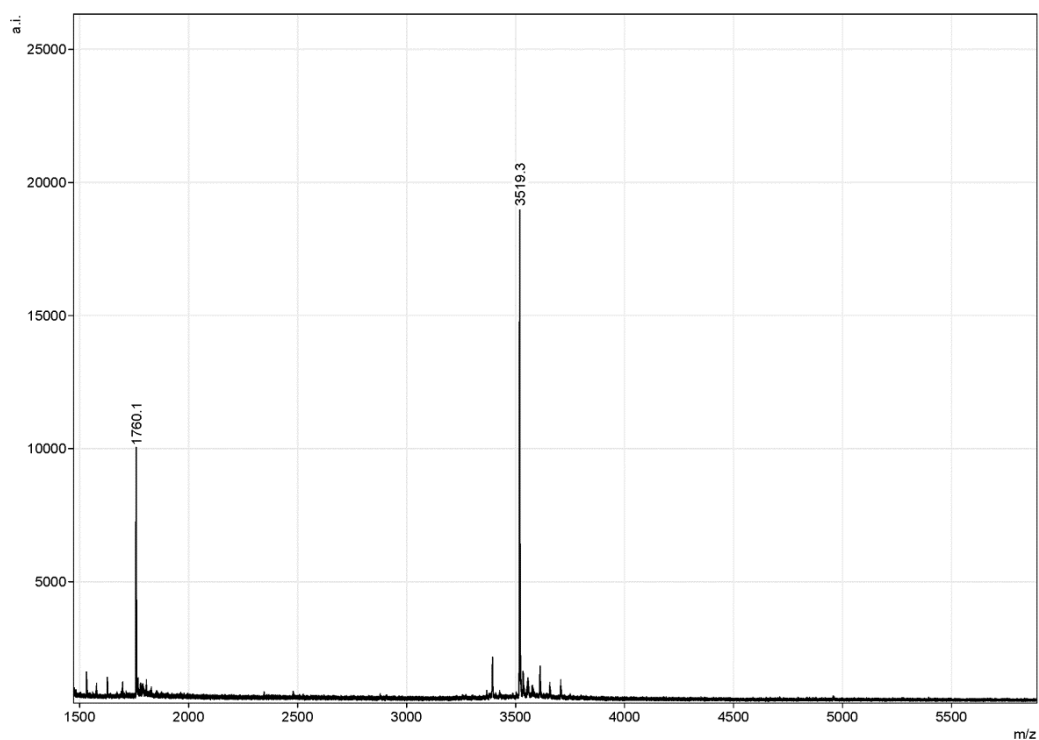

**Figure S28** MALDI-TOF spectrum of ON<sup>Nick<sub>2A</sub></sup> A<sup>PT</sup>. Calculated: 3517.58 Da; found: 3519.3 Da;  $\Delta = 1.72$

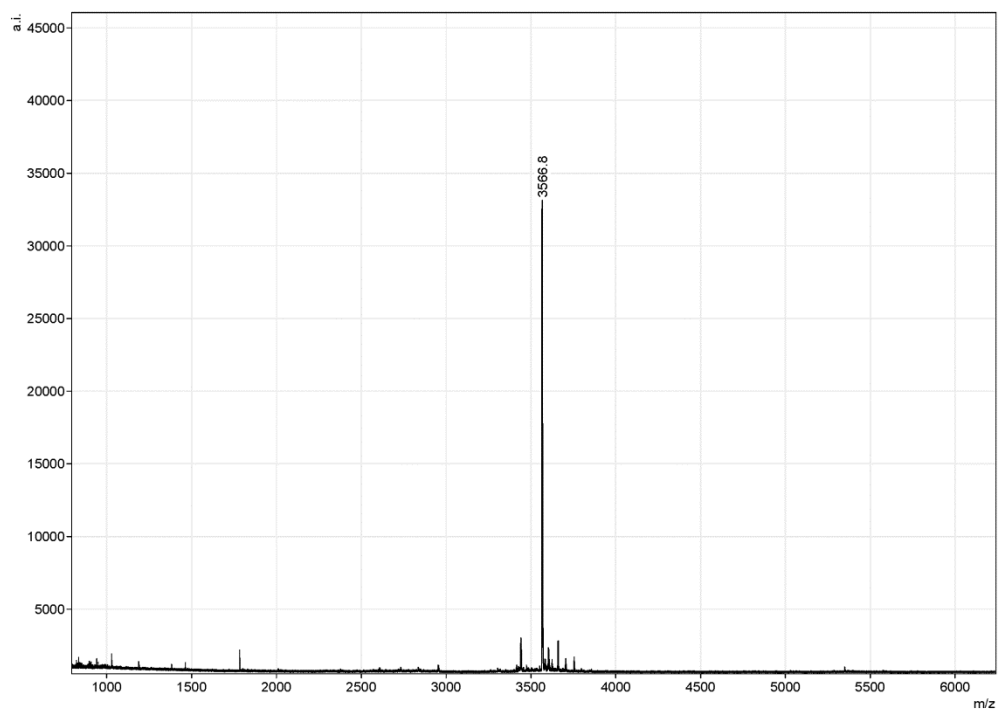

**Figure S29** MALDI-TOF spectrum of ON<sup>Nick<sub>2A</sub></sup> A<sup>EPT</sup>. Calculated: 3565.62 Da; found: 3566.8 Da;  $\Delta = 1.18$



5'-P-TTCATGACTG-3'

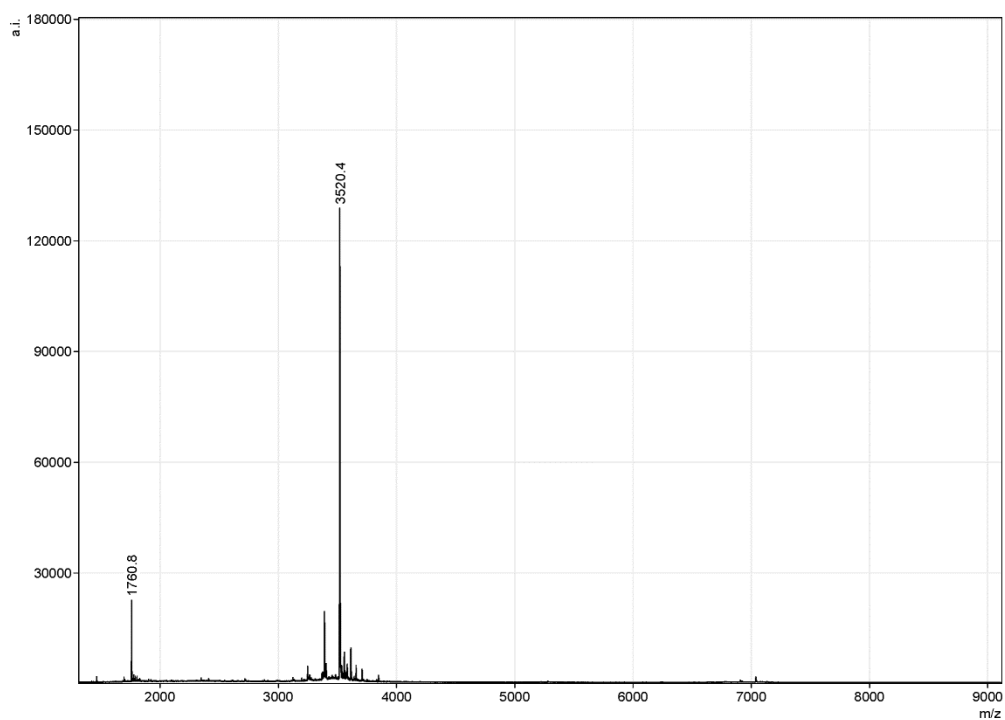

**Figure S30** MALDI-TOF spectrum of ON<sup>Nick<sub>2</sub>C</sup> C<sup>PT</sup>. Calculated: 3519.58 Da; found: 3520.4 Da;  $\Delta = 1.34$

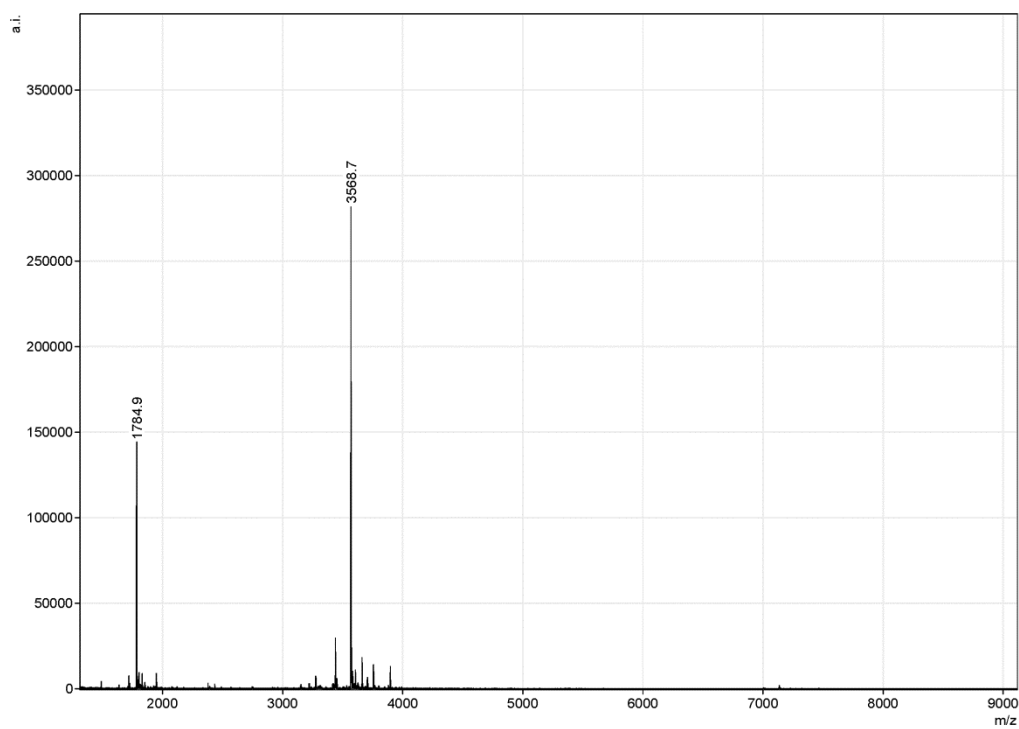

**Figure S31** MALDI-TOF spectrum of ON<sup>Nick<sub>2</sub>C</sup> C<sup>EPT</sup>. Calculated: 3567.62 Da; found: 3568.7 Da;  $\Delta = 1.34$

5'-P-TAGCATGCTACGTCAG-3'

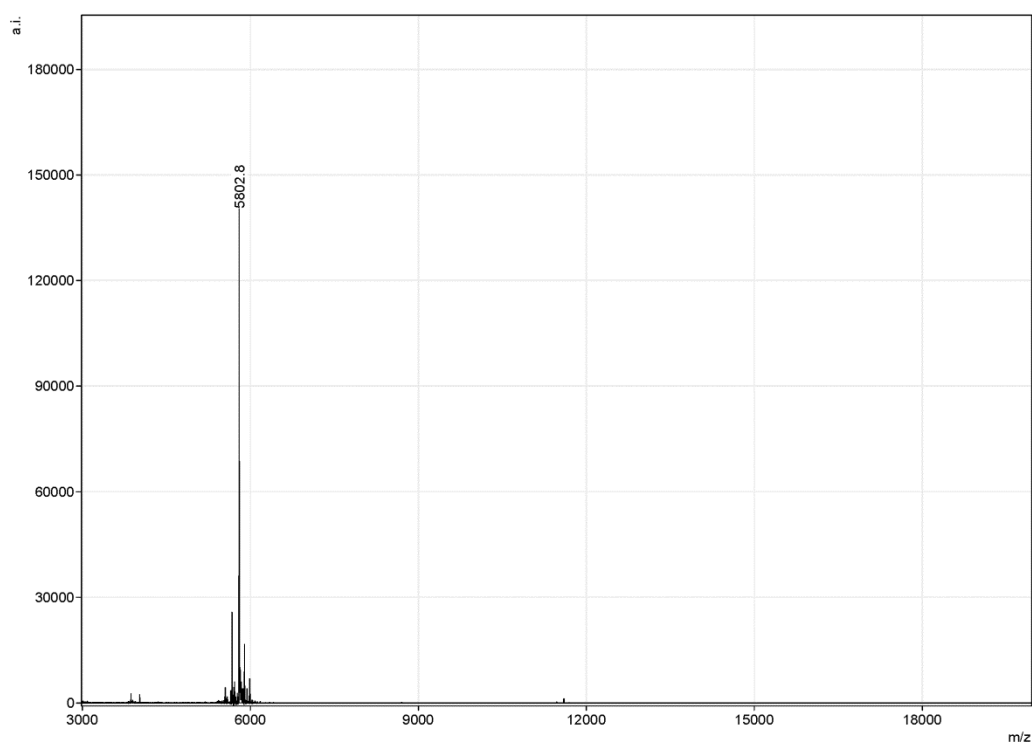

**Figure S32** MALDI-TOF spectrum of ON<sup>Nick<sub>4A</sub></sup> A<sup>PT</sup>. Calculated: 5801.36 Da; found: 5802.8 Da;  $\Delta = 1.44$

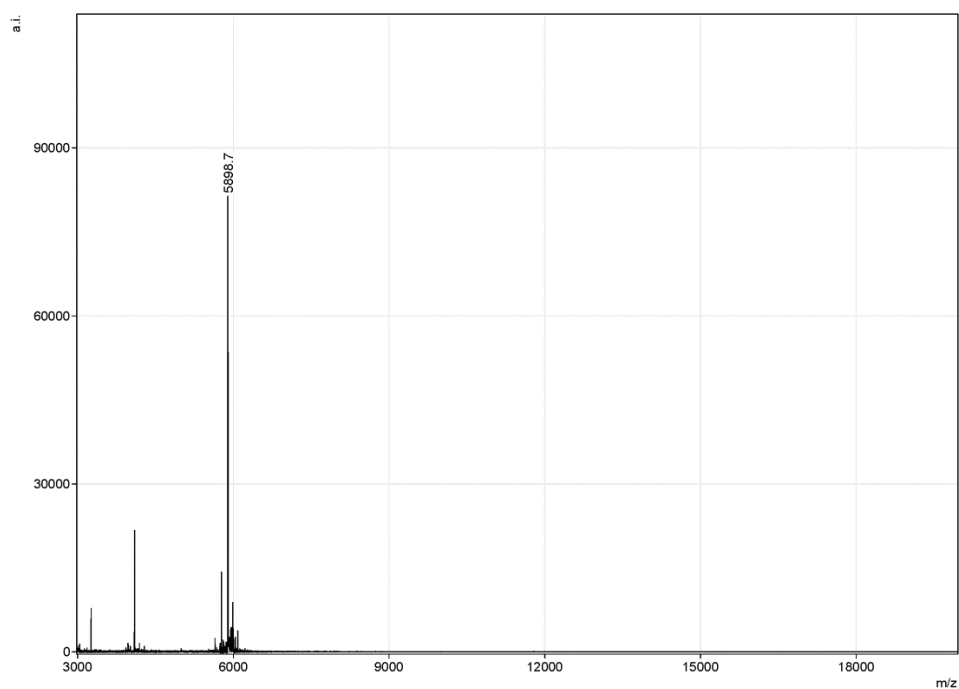

**Figure S33** MALDI-TOF spectrum of ON<sup>Nick<sub>4A</sub></sup> A<sup>EPT</sup>. Calculated: 5897.44 Da; found: 5898.7 Da;  $\Delta = 1.26$

5'-P-TAGCATGCTACGTCAG-3

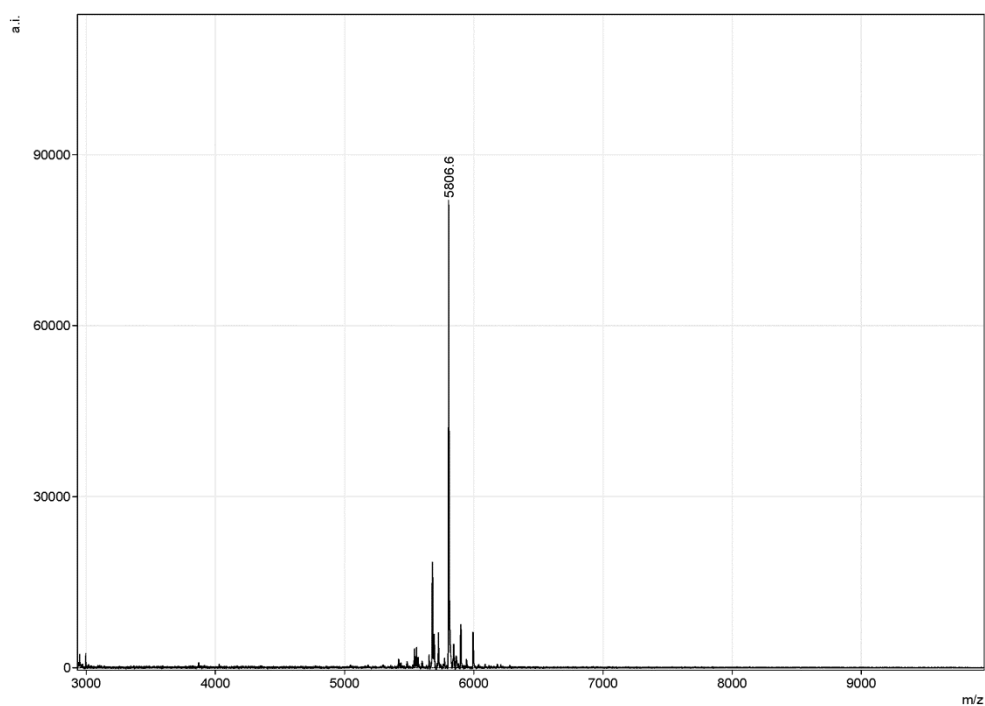

**Figure S34** MALDI-TOF spectrum of  $\text{ON}^{\text{Nick}_4\text{C}} \text{C}^{\text{PT}}$ . Calculated: 5805.36 Da; found: 5806.6 Da;  $\Delta = 1.24$

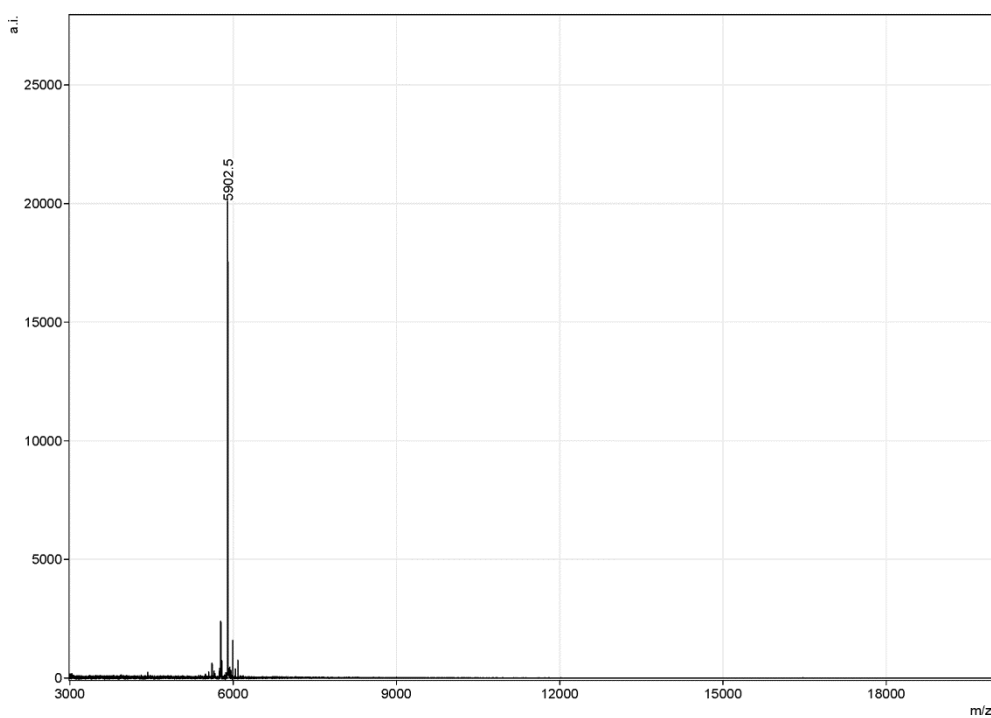

**Figure S35** MALDI-TOF spectrum of  $\text{ON}^{\text{Nick}_4\text{C}} \text{C}^{\text{EPT}}$ . Calculated: 5901.44 Da; found: 5902.5 Da;  $\Delta = 1.06$

## 7. Copies of NMR spectra

$^1\text{H}$  NMR and  $^{13}\text{C}$  spectra of  $\text{dC}^{\text{PT}}$ .

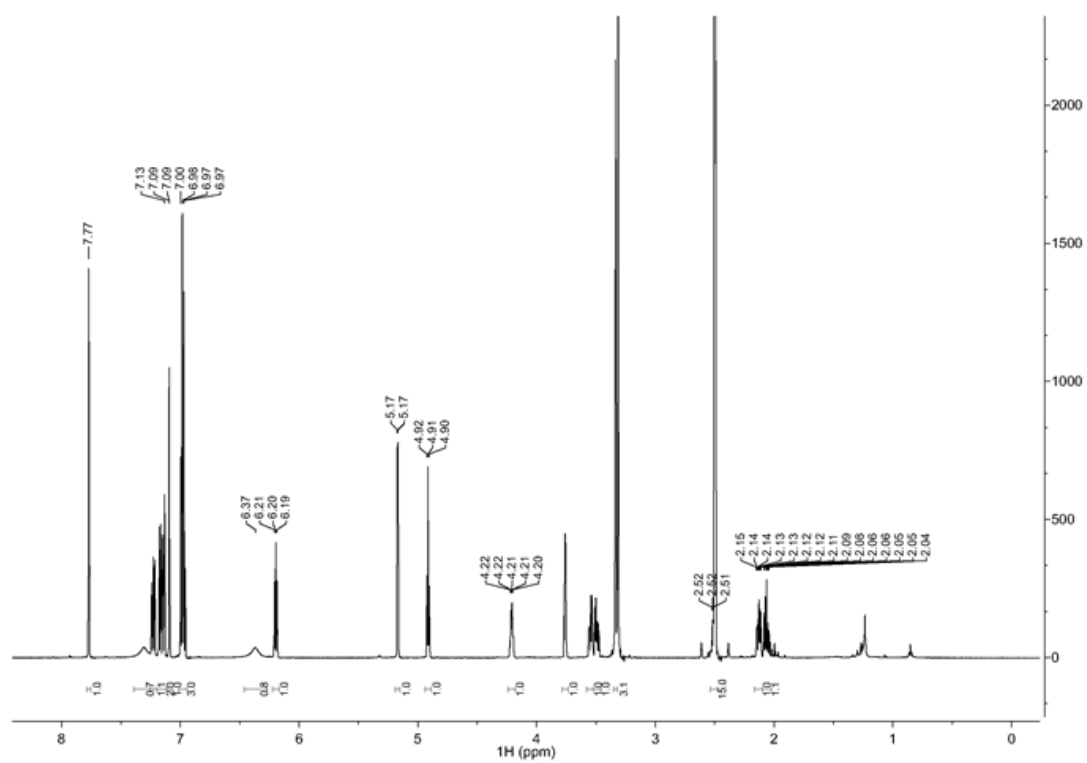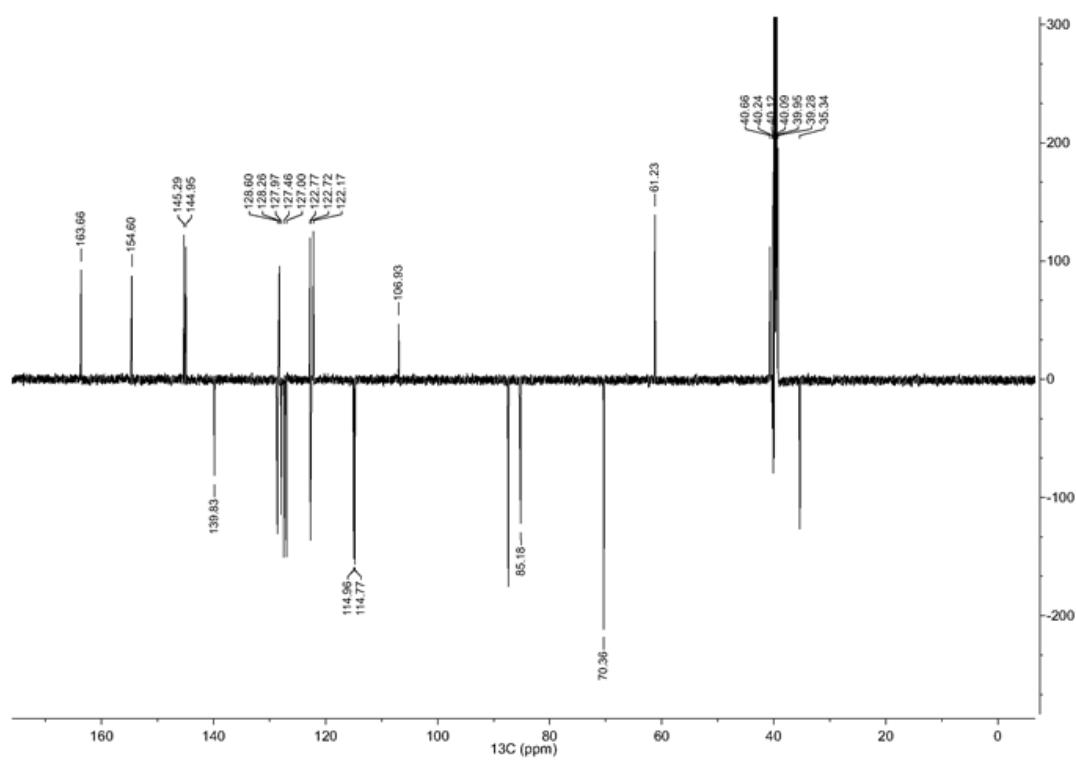

<sup>1</sup>H NMR and <sup>13</sup>C spectra of **dA<sup>PT</sup>**.

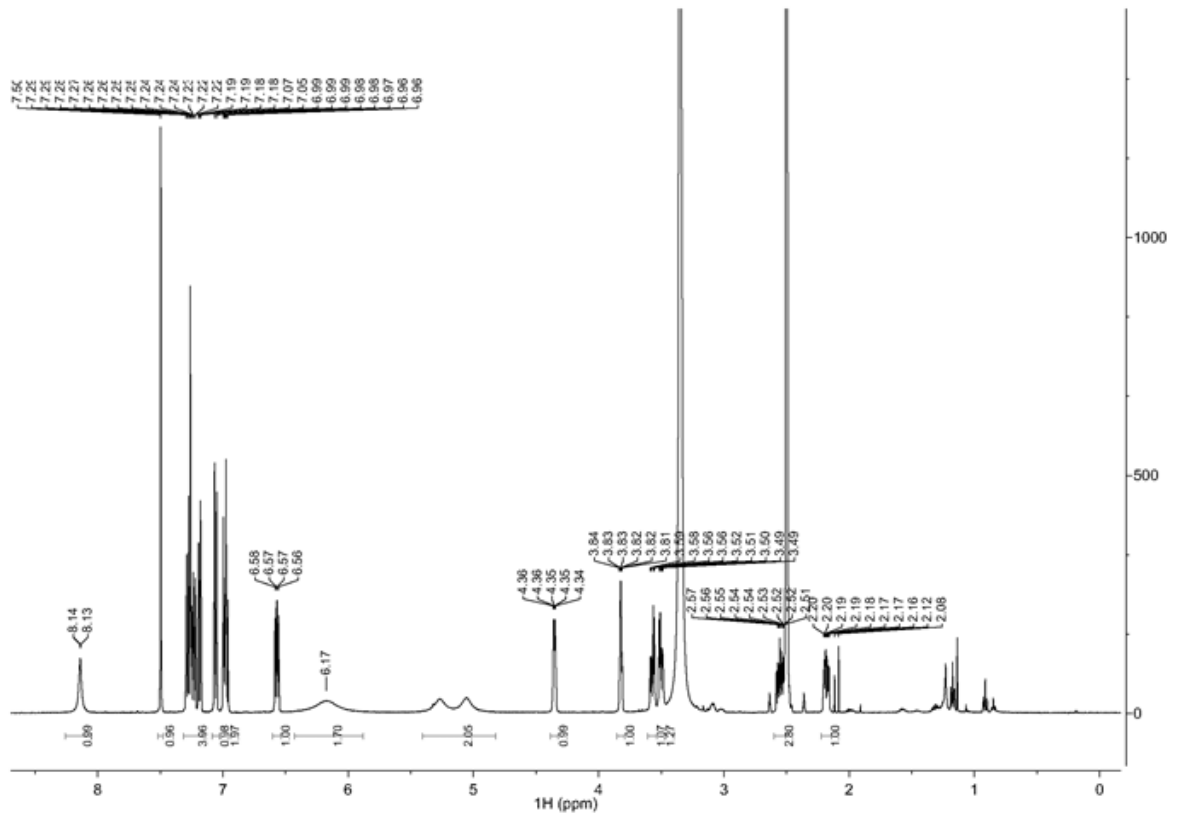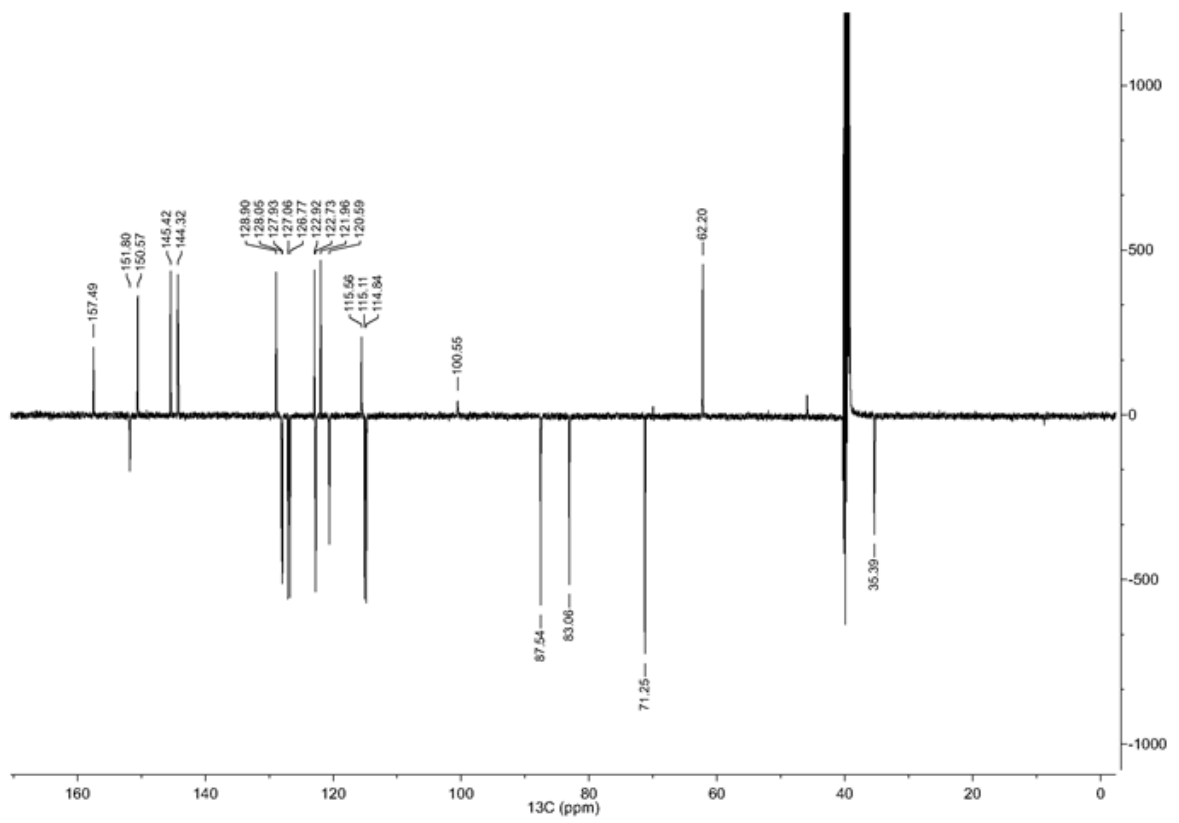

$^1\text{H}$  NMR and  $^{13}\text{C}$  spectra of  $\text{dC}^{\text{EPT}}$ .

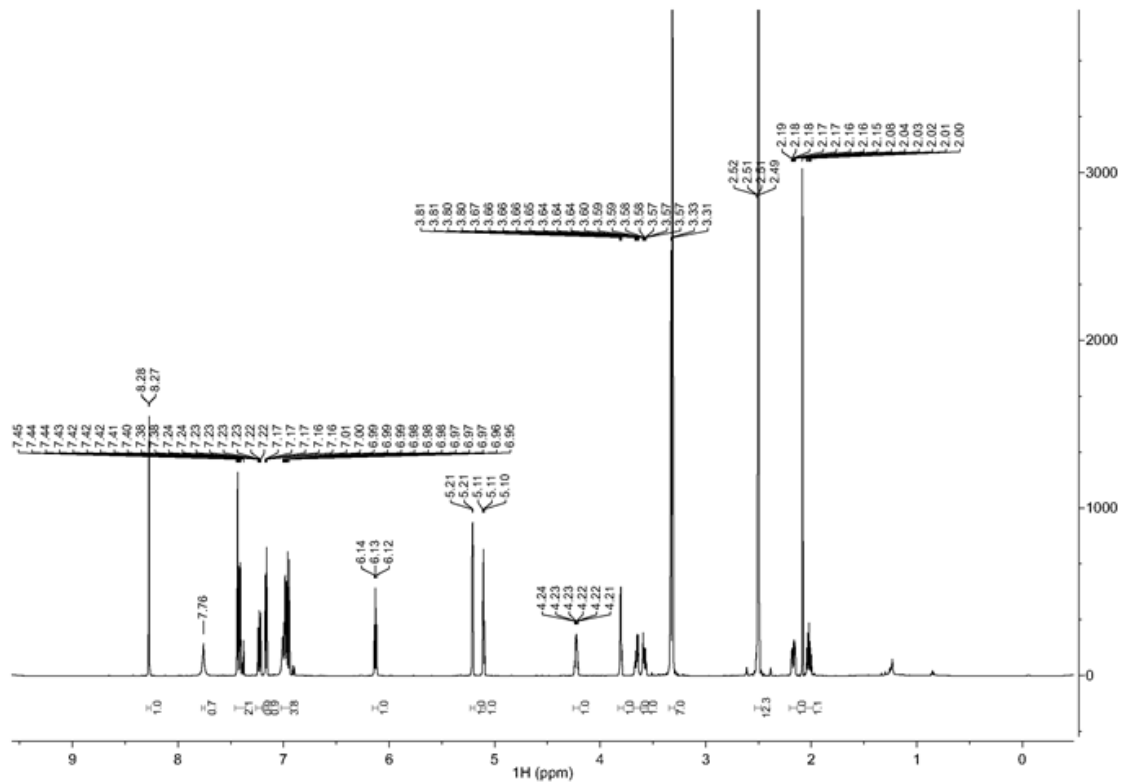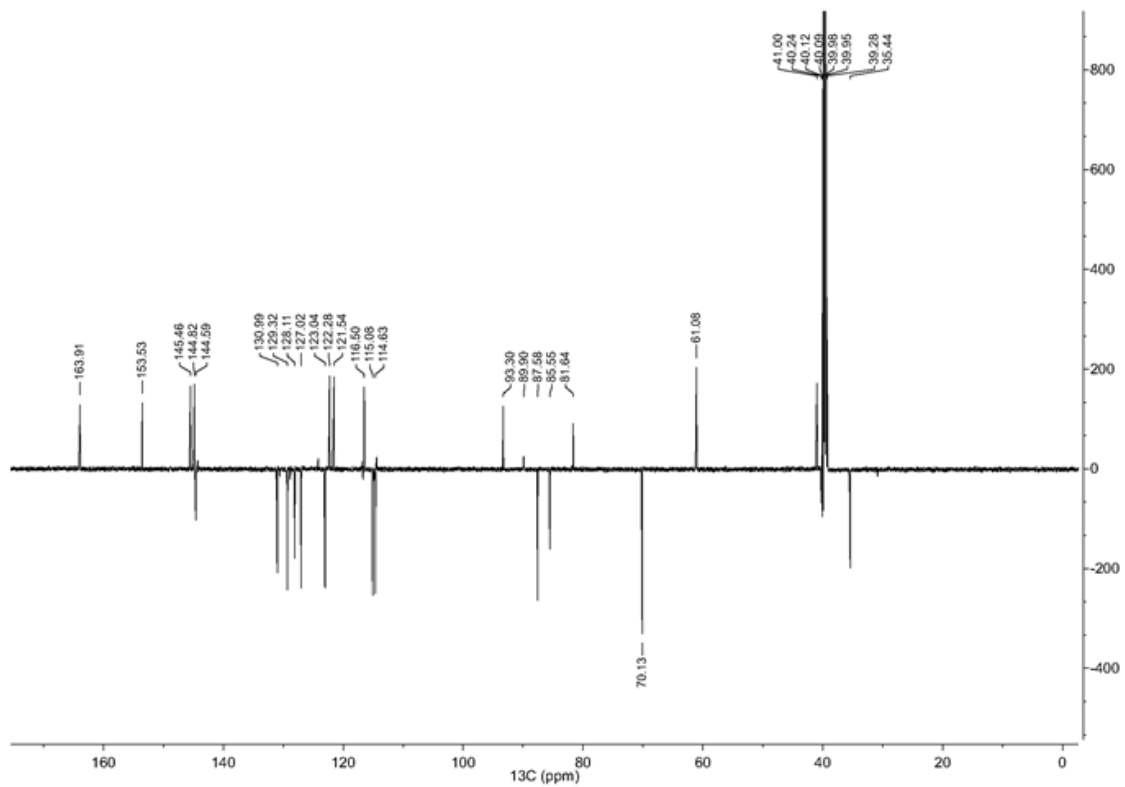

$^1\text{H}$  NMR and  $^{13}\text{C}$  spectra of **dA<sup>EPT</sup>**.

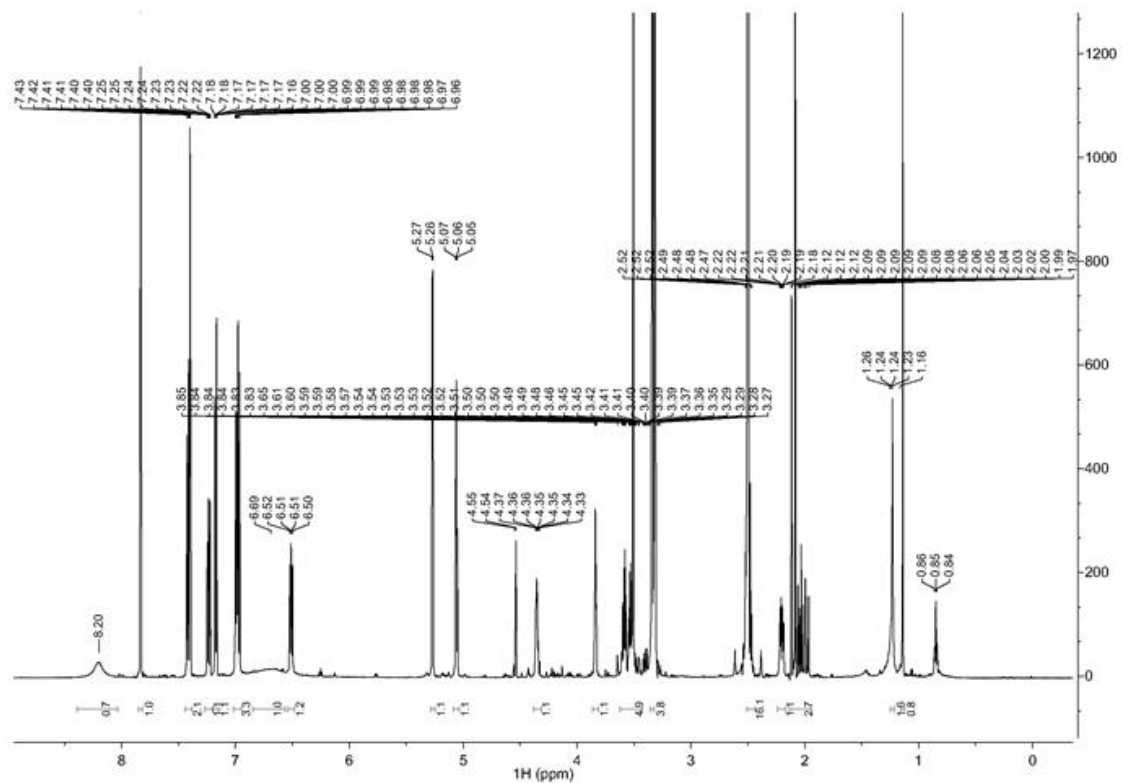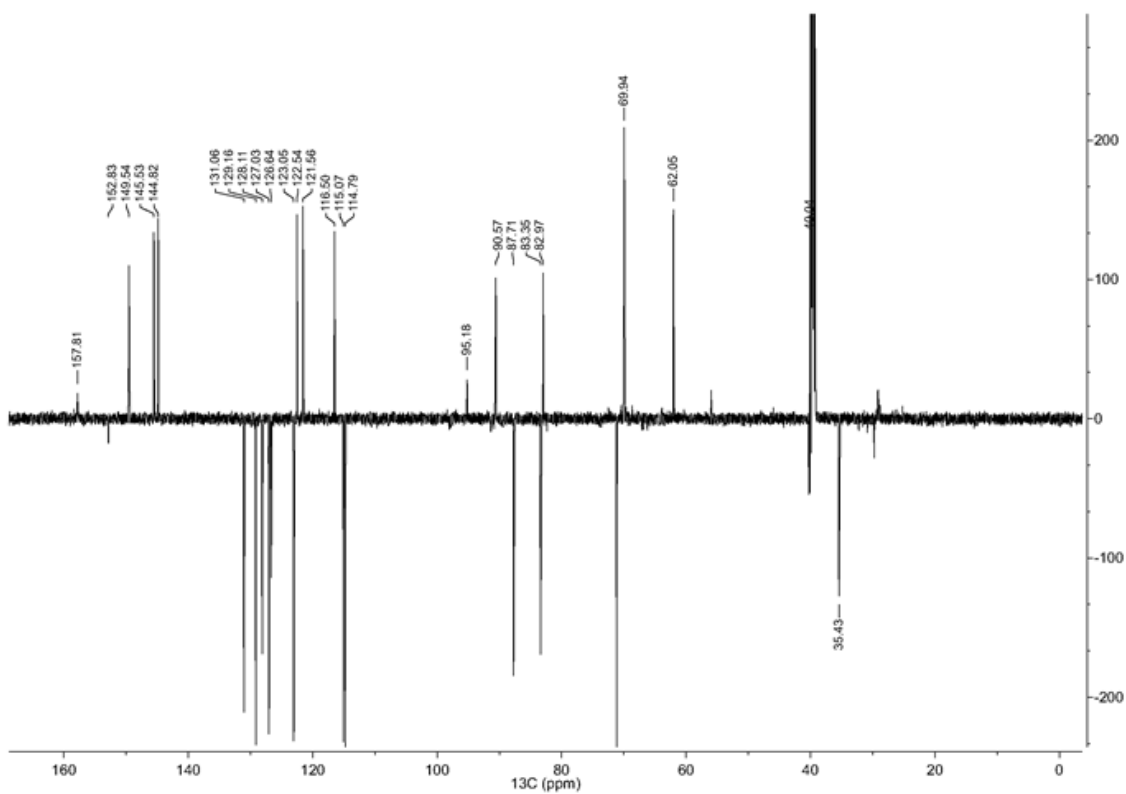

<sup>1</sup>H NMR, <sup>13</sup>C and <sup>31</sup>P spectra of dC<sup>PT</sup>TP.

SIMONOVA AS-411A  
<sup>1</sup>H NMR in D<sub>2</sub>O  
 03-03-15 RA  
 \*\*\*\*\*

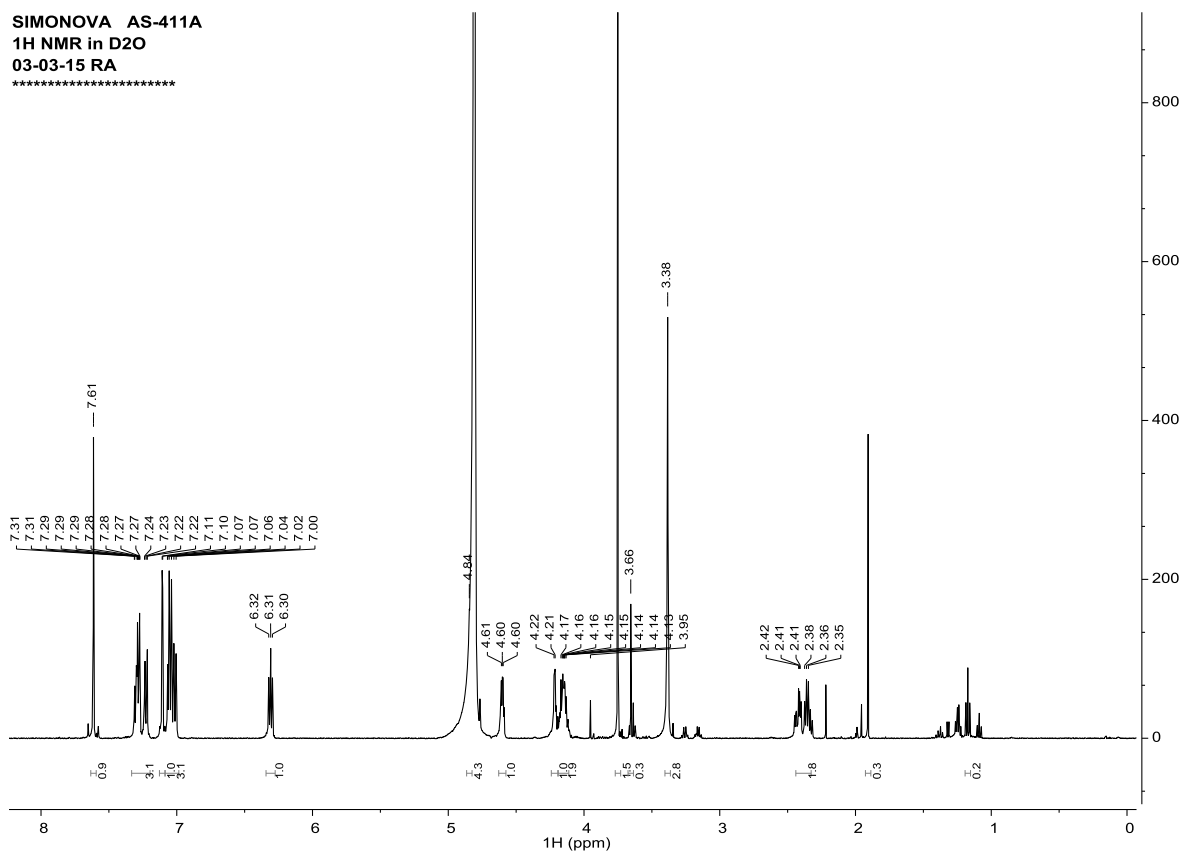

SIMONOVA AS-411A  
 APT in D<sub>2</sub>O  
 03-03-15 RA  
 \*\*\*\*\*

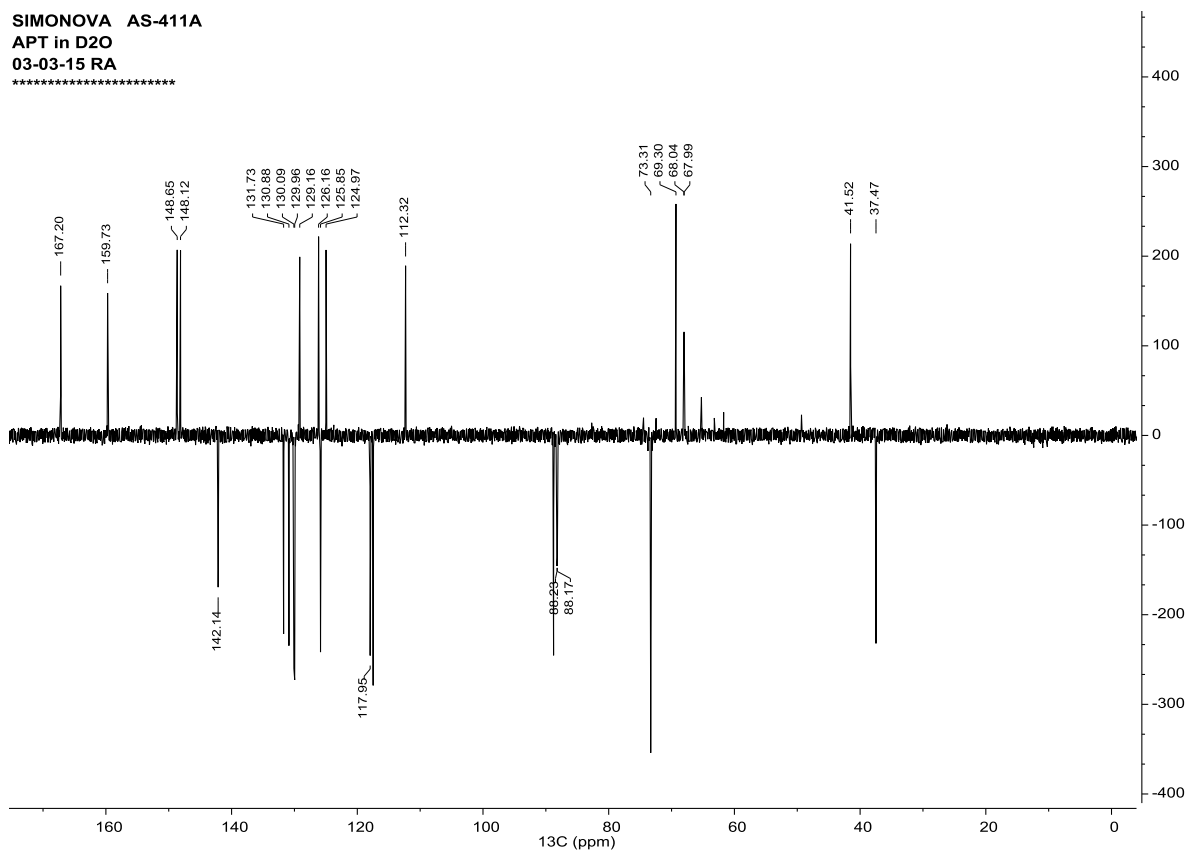



SIMONOVA AS-411A  
 31P{1H} in D2O  
 03-03-15 RA  
 \*\*\*\*\*

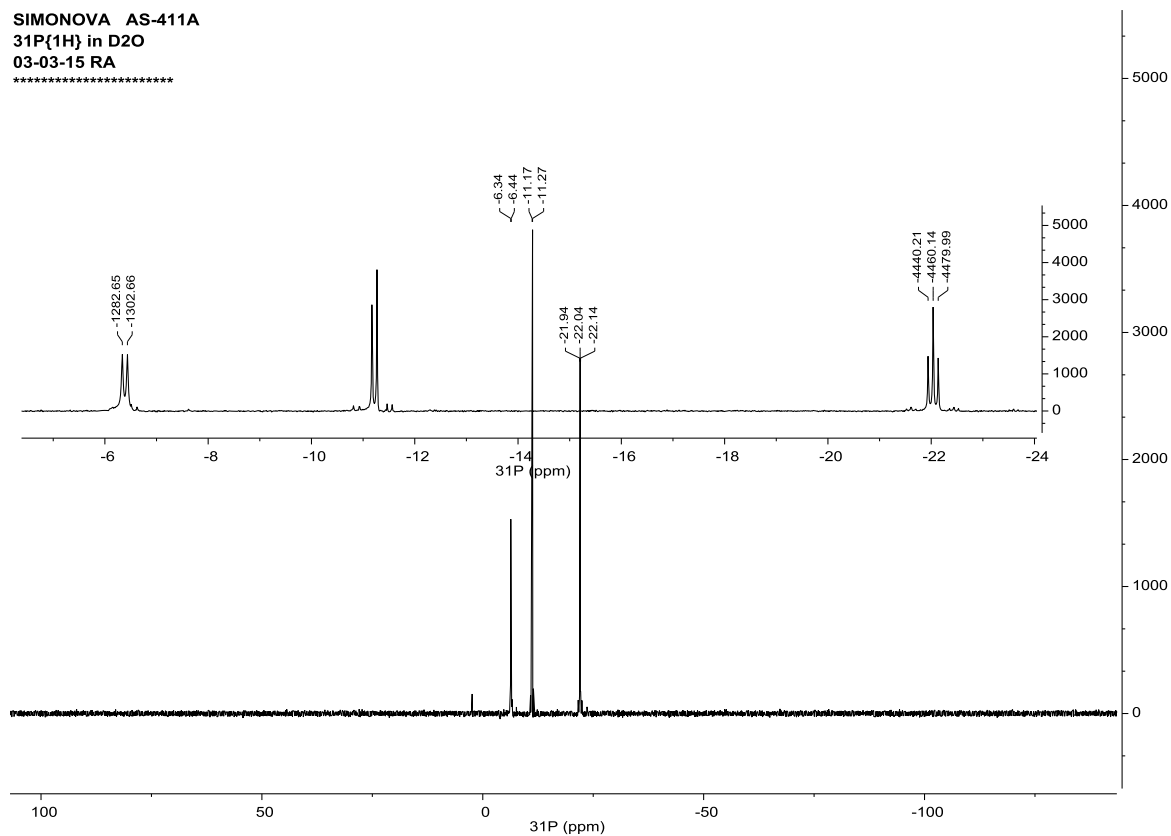

$^1\text{H}$  NMR,  $^{13}\text{C}$  and  $^{31}\text{P}$  spectra of  $\text{dA}^{\text{PTTP}}$ .

SIMONOVA AS-412\_3A  
 1H NMR in D2O  
 14-02-17 RA  
 \*\*\*\*\*

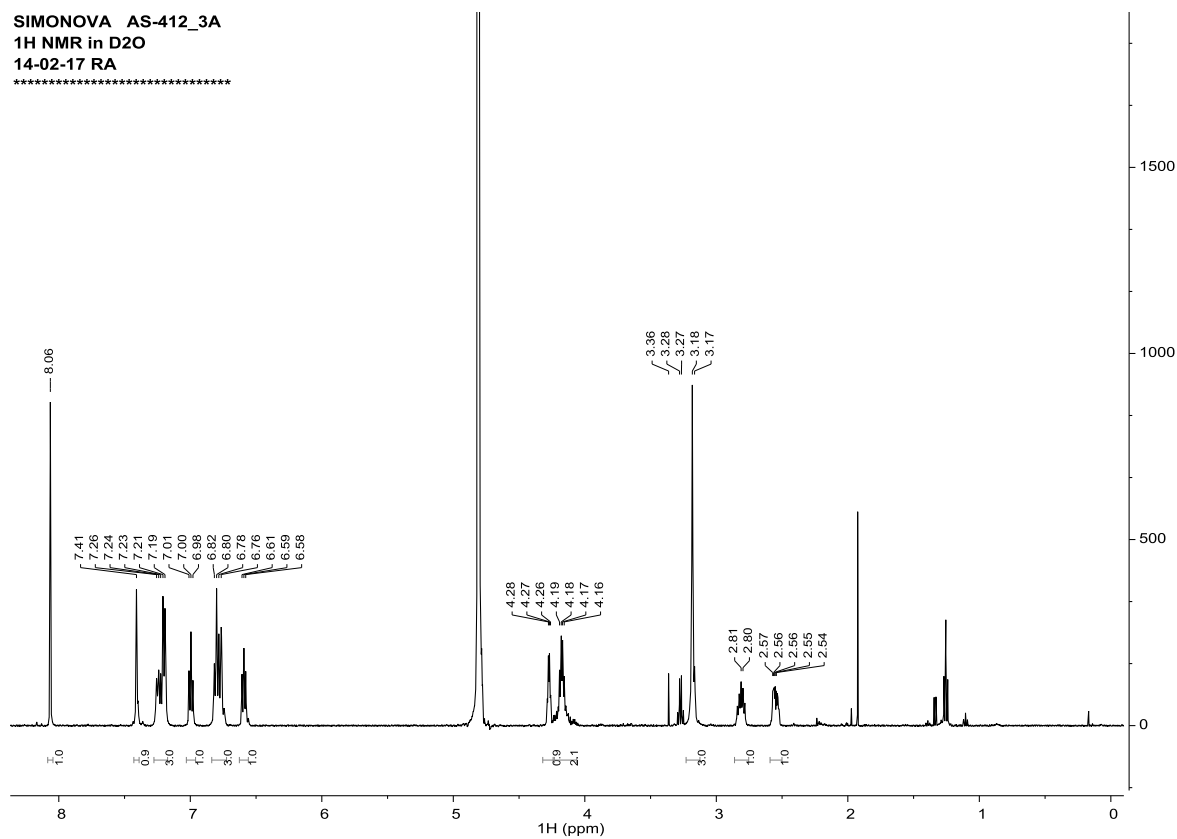

SIMONOVA AS-412\_3A  
APT in D2O  
14-02-17 RA  
\*\*\*\*\*

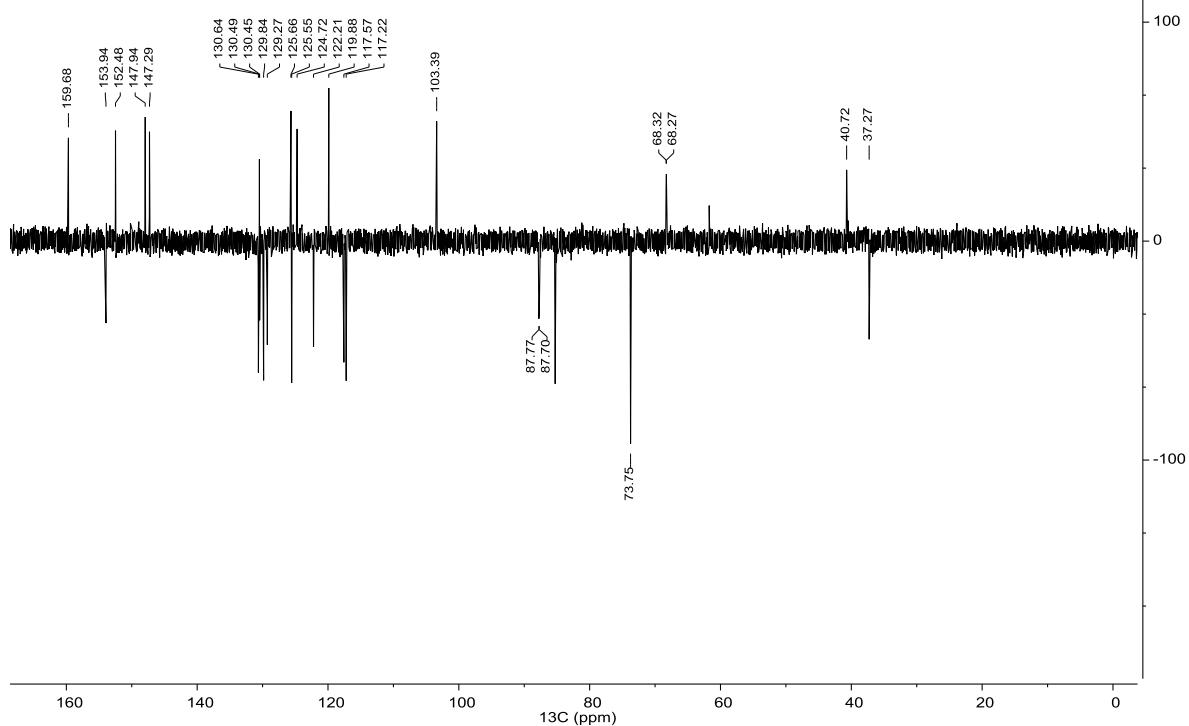

SIMONOVA AS-412\_3A  
31P{1H} NMR in D2O  
14-02-17 RA  
\*\*\*\*\*

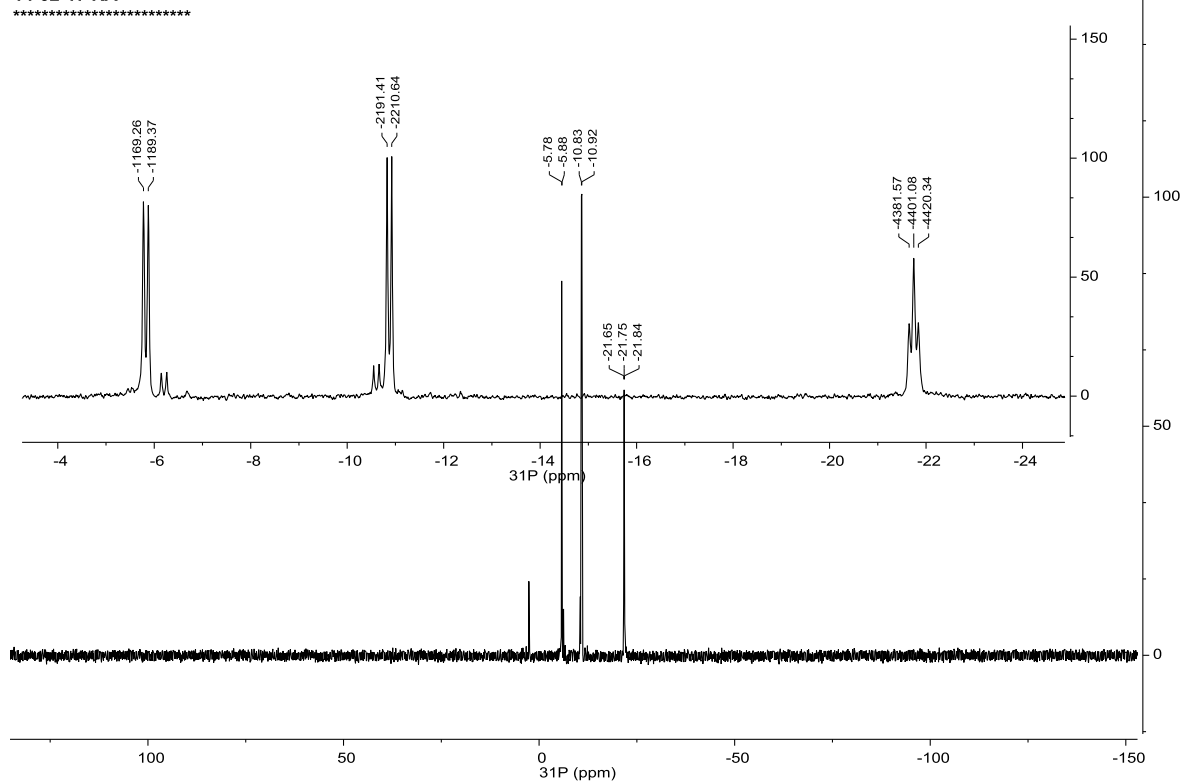

$^1\text{H}$  NMR,  $^{13}\text{C}$  and  $^{31}\text{P}$  spectra of **dC<sup>EPT</sup>TP**.

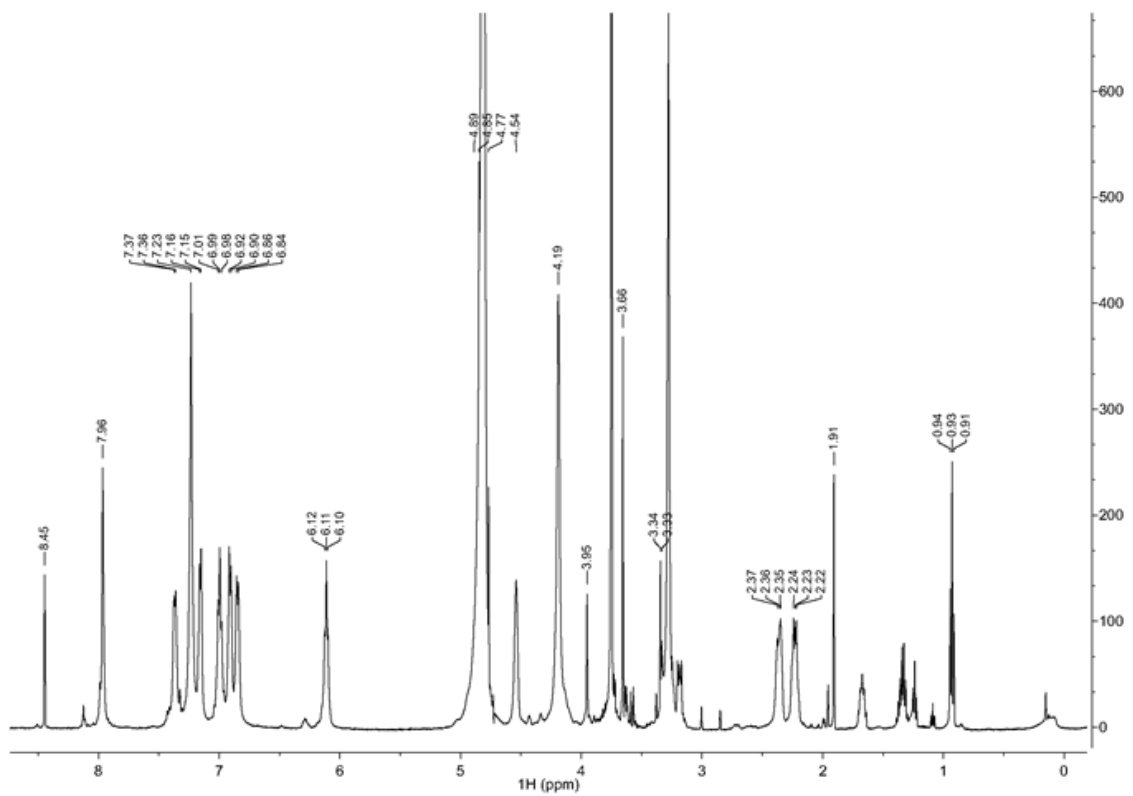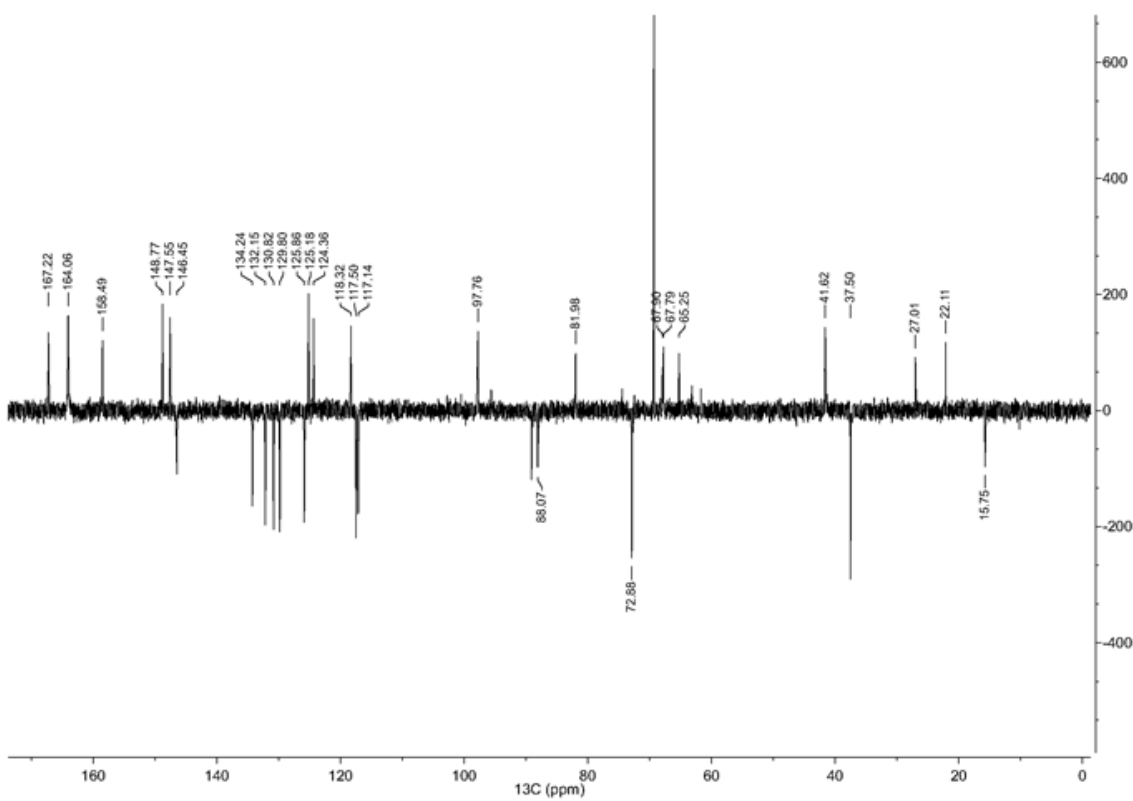

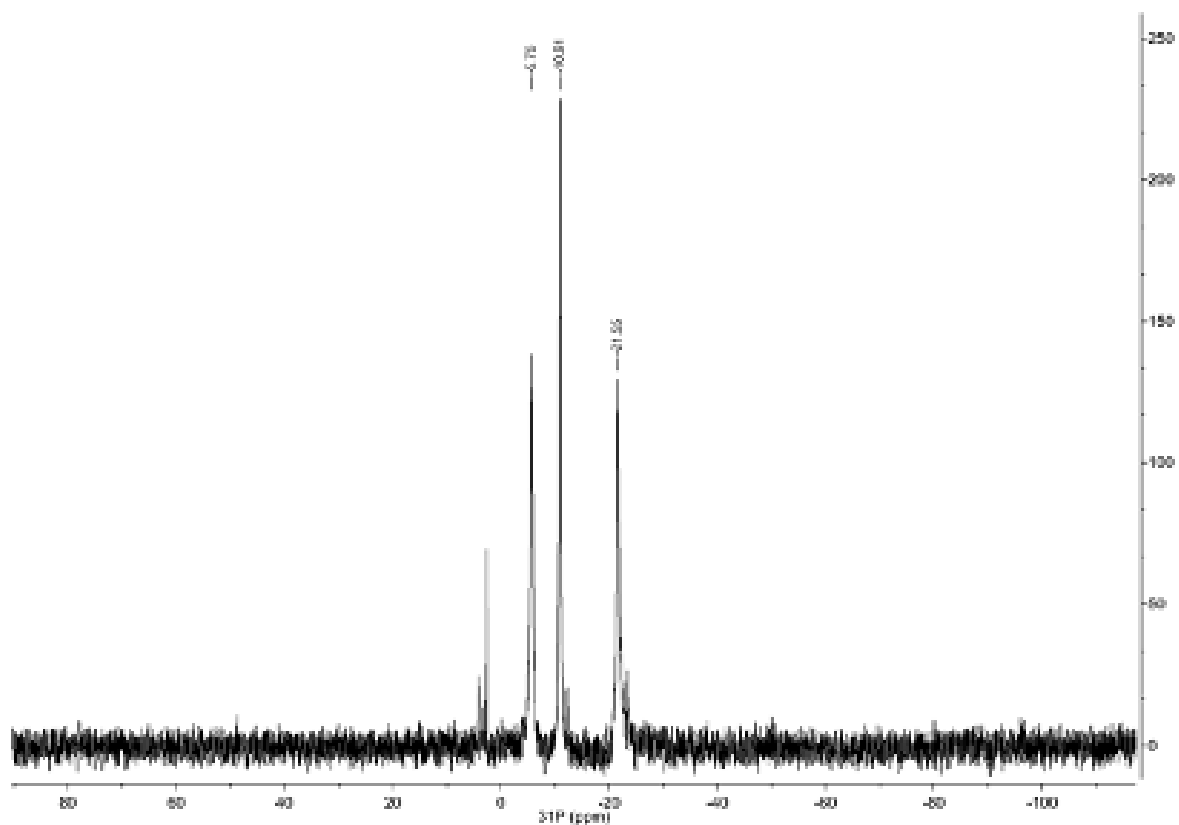

$^1\text{H}$  NMR,  $^{13}\text{C}$  and  $^{31}\text{P}$  spectra of  $\text{dA}^{\text{EPTTP}}$ .

SIMONOVA AS-429B2  
 1H NMR in D2O  
 16-03-15 RA  
 \*\*\*\*\*

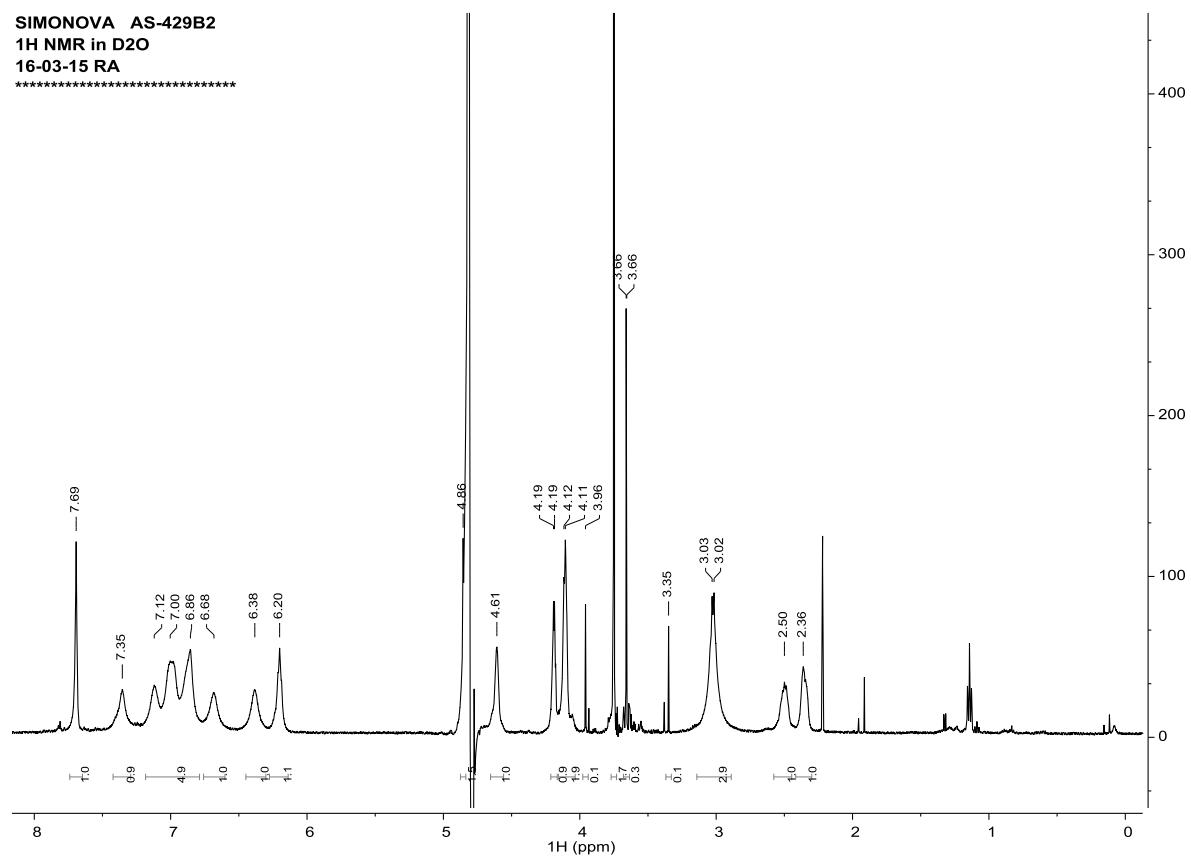

SIMONOVA AS-429B2  
APT in D2O  
16-03-15 RA  
\*\*\*\*\*

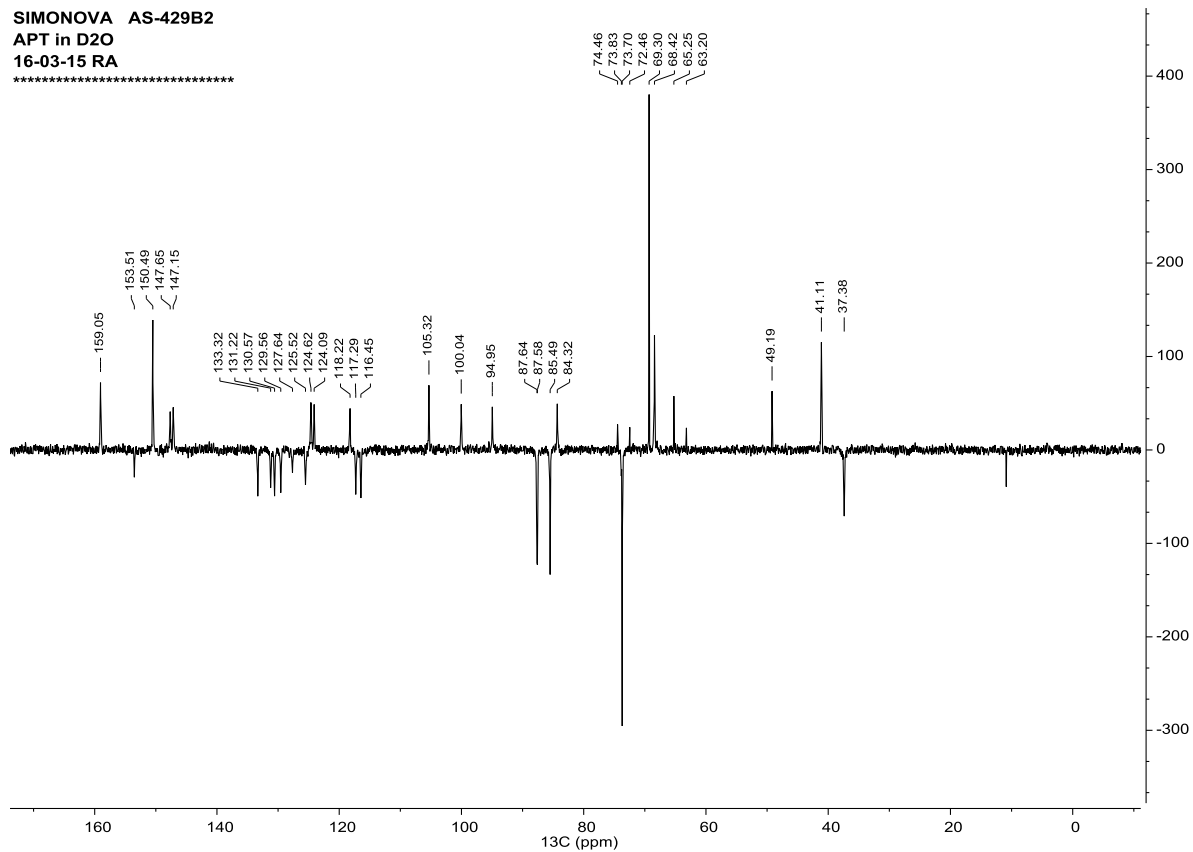

SIMONOVA AS-429B2  
31P{1H} NMR in D2O  
17-03-15 RA  
\*\*\*\*\*

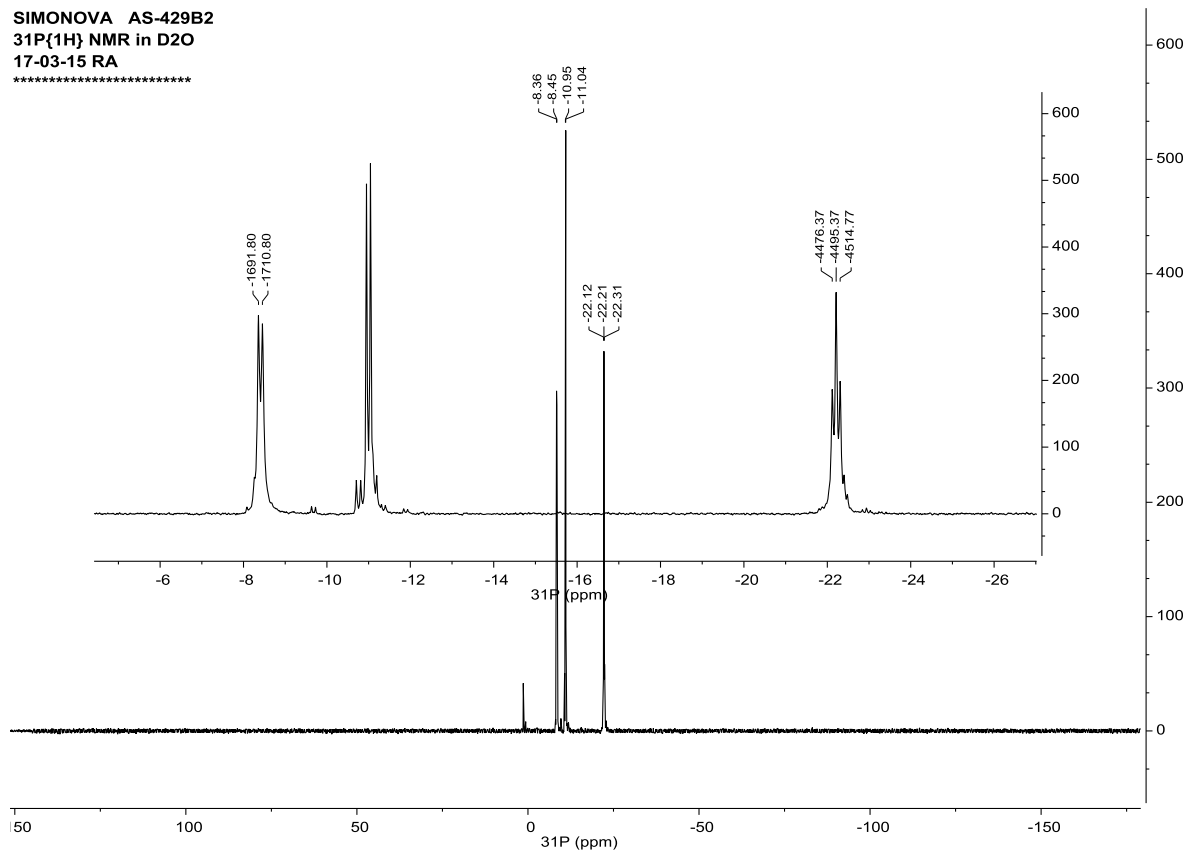

## 8. Additional electrochemistry data

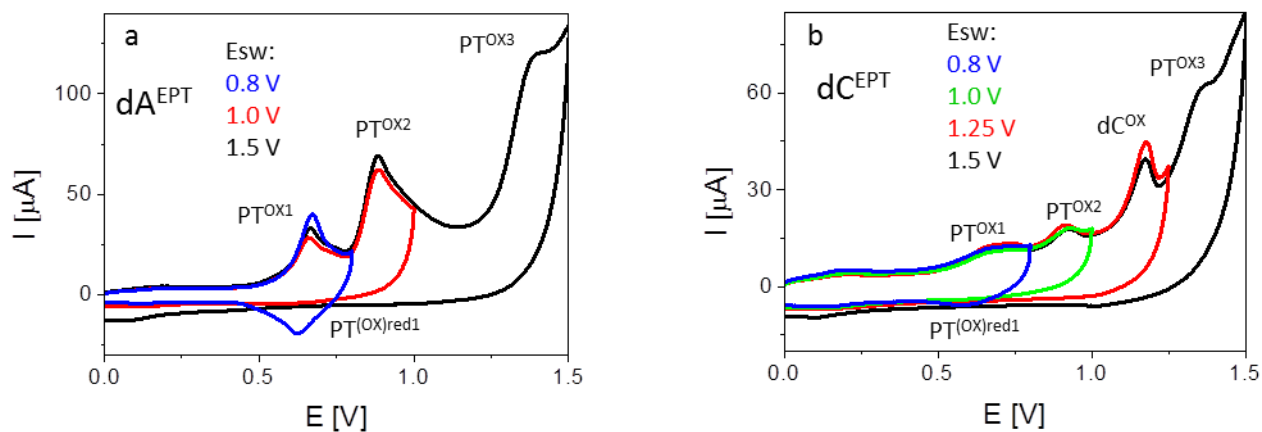

**Figure S36** CV responses of  $\text{dA}^{\text{EPT}}$  (a),  $\text{dC}^{\text{EPT}}$  (b) at PGE.  $C = 40 \mu\text{M}$ , electrolyte 0.2 M acetate buffer (pH 5.0). CV parameters: scan rate 1 V/s,  $E_i = 0.0 \text{ V}$ , Esw see legend in the Figure.

(Supplement to Fig. 6 that shows CVs of PT and  $\text{dN}^{\text{PT}}$  conjugates)

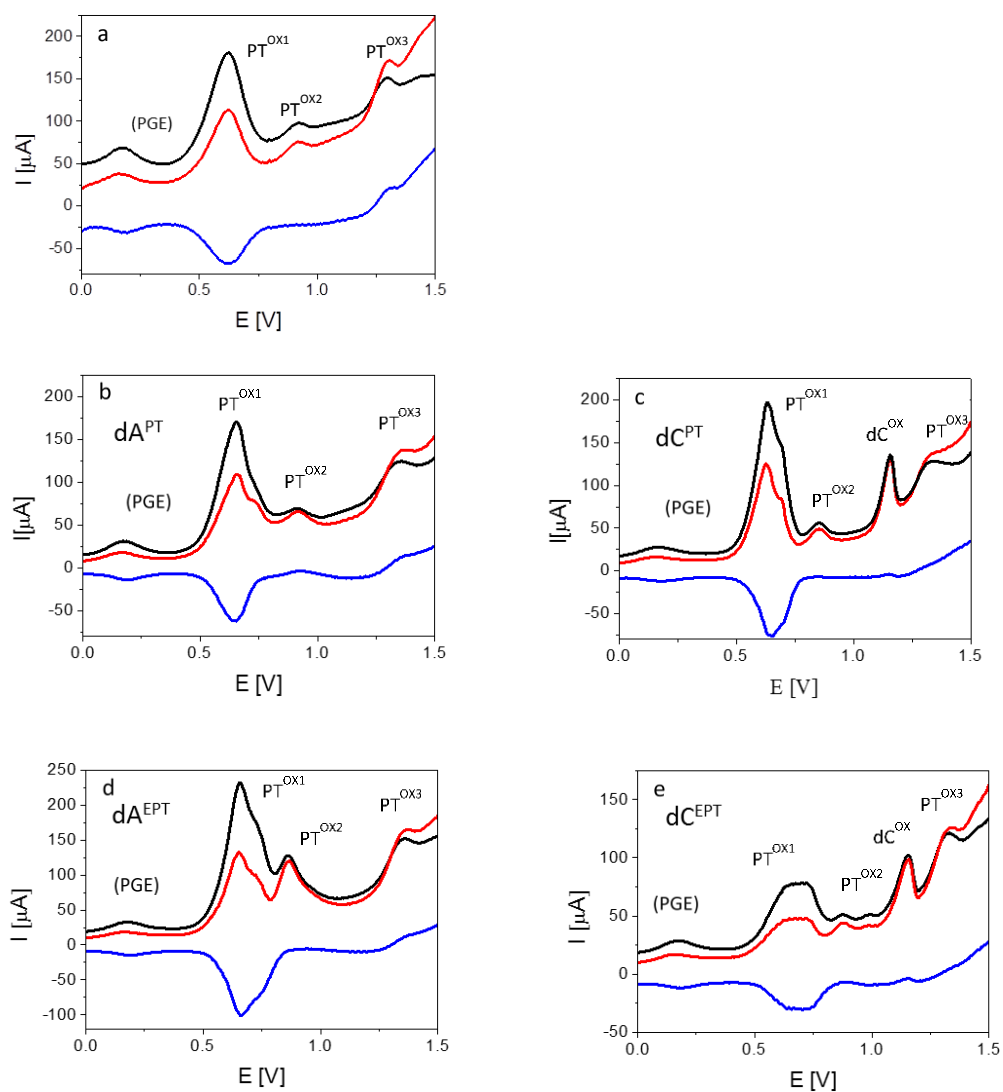

**Figure S37** Components of the SWV current of phenothiazine (a) ,  $dA^{PT}$  (b),  $dC^{PT}$  (c),  $dA^{EPT}$  (d),  $dC^{EPT}$  (e) at PGE.  $C = 40 \mu\text{M}$ , electrolyte 0.2 M acetate buffer (pH 5,0). parameters: frequency 200 Hz, amplitude 50 mV,  $E_i = 0.0 \text{ V}$ . net current (black), forward current (red), backward current (blue).

(Supplement to Fig. 7 to demonstrate reversibility of SWV peak  $PT^{ox1}$  and irreversibility of the more positive signals. See the counter peak on blue curves representing the backward current component).

**Table S1** SWV peak potentials of PT, PT-modified nucleosides and ONs

|                         | PT <sup>ox1</sup> /mV | PT <sup>ox2</sup> /mV | PT <sup>ox3</sup> /mV | dC/mV |
|-------------------------|-----------------------|-----------------------|-----------------------|-------|
| <b>PT</b>               | 625                   | 920                   | 1290                  | -     |
| <b>dA<sup>PT</sup></b>  | 655*                  | 920                   | 1355                  | -     |
| <b>dA<sup>EPT</sup></b> | 655*                  | 860                   | 1360                  | -     |
| <b>dC<sup>PT</sup></b>  | 630*                  | 855                   | 1330                  | 1160  |
| <b>dC<sup>EPT</sup></b> | 640/720 <sup>#</sup>  | 880/985               | 1330                  | 1160  |

|                                              | PT <sup>ox1</sup> /mV | PT <sup>ox2</sup> /mV | PT <sup>ox3</sup> /mV | PT <sup>ox2</sup> /G(A*) <sup>ox</sup> /mV | G(A*) <sup>ox</sup> /mV | A <sup>ox</sup> /mV |
|----------------------------------------------|-----------------------|-----------------------|-----------------------|--------------------------------------------|-------------------------|---------------------|
| ON <sup>nick_4A</sup> <b>A<sup>PT</sup></b>  | 460                   | 790                   | 1285                  | -                                          | 1060                    | -                   |
| ON <sup>nick_4A</sup> <b>A<sup>EPT</sup></b> | 510                   | -                     | 1320                  | 995                                        | -                       | -                   |
| ON <sup>nick</sup> natural                   | -                     | -                     | -                     | -                                          | 1080                    | 1360                |

|                                           | PT <sup>ox1</sup> /mV | PT <sup>ox2</sup> /mV | G <sup>ox</sup> /mV | A <sup>ox</sup> /mV |
|-------------------------------------------|-----------------------|-----------------------|---------------------|---------------------|
| ON <sup>rnd16</sup> <b>A<sup>PT</sup></b> | 550                   | 815                   | 1090                | 1360                |
| ON <sup>rnd16</sup> natural               | -                     | -                     | 1080                | 1360                |

All potentials are given against Ag|AgCl|3M KCl reference electrode; conditions of measurements as in Fig. 6 and Fig. 7.

\* the major SWV peak

<sup>#</sup> range of potentials spanning the double-peak envelope, see Fig. 7

## 9. References

S1 W. H. Melhuish, W. H. *J. Phys. Chem.*, 1961, **65**, 229–235

S2 C. Würth, M. Grabolle, J. Pauli, M. Spieles, U. Resch-Genger, *Nature Protocols*, 2013, **8**, 1535–1550.
